# Supplementary material for: Changes of miRNA Expression Profiles from Cervical-Vaginal Fluid-Derived Exosomes in Response to HPV16 Infection
Source: Biomed Res Int. 2020 Jun 3;2020:7046894. doi: 10.1155/2020/7046894 (PMC7292968; doi:10.1155/2020/7046894)
Supplement: Supplementary materials — Supplementary Table 1: all of the differentially expressed miRNAs. Supplementary Table 2: list of qPCR primers used in this study. Supplementary Table 3: target genes of differentially expressed miRNAs. [file 7046894.f1.xlsx]

## Sheet: Supplementary table 1
SystematicName	p-value	Fold change	HPV16.1_NS	HPV16.2_NS	Control.1_NS	Control.2_NS
hsa-miR-363-5p	0.0410891	0.979306	4.34085	4.35044	4.45607	4.41887
hsa-miR-3927-5p	0.00813887	0.982564	4.38364	4.37061	4.4521	4.4575
hsa-miR-548t-5p	0.0345385	0.985937	4.35537	4.37853	4.42655	4.43193
hsa-miR-621	0.0147768	0.986041	4.32593	4.32309	4.39312	4.37834
hsa-miR-6810-3p	0.0155926	0.986209	4.34139	4.3439	4.41094	4.3958
hsa-miR-4436a	0.0169342	0.988017	4.32891	4.34197	4.38571	4.39034
hsa-miR-6728-3p	0.0324839	0.988059	4.33097	4.33345	4.39416	4.37497
hsa-miR-645	0.0403766	0.989197	4.34395	4.35798	4.39157	4.40539
hsa-miR-4322	0.0408542	0.989394	4.35569	4.37449	4.41451	4.40926
hsa-miR-3178	0.00118615	0.989544	4.32141	4.32452	4.36842	4.36887
hsa-miR-3145-5p	0.0224697	0.989783	4.32254	4.30911	4.3614	4.35935
hsa-miR-211-5p	0.00262753	0.989923	4.39492	4.39576	4.43783	4.44234
hsa-miR-5700	0.0408919	0.989961	4.43048	4.44886	4.48274	4.48664
hsa-miR-299-5p	0.0417371	0.990345	4.36331	4.37207	4.40243	4.41811
hsa-miR-1911-3p	0.000592948	0.990382	4.35356	4.35557	4.39707	4.39664
hsa-miR-6817-3p	0.0457869	0.990438	4.33743	4.35594	4.38957	4.38773
hsa-miR-1973	0.00879618	0.990453	4.32886	4.32104	4.36619	4.3671
hsa-miR-554	0.0250303	0.99049	4.33237	4.32207	4.37305	4.36448
hsa-miR-6734-3p	0.005669	0.990805	4.35467	4.35379	4.39766	4.39161
hsa-miR-4285	0.000319451	0.990891	4.33729	4.33637	4.37724	4.37615
hsa-miR-6814-5p	0.0471459	0.991066	4.34794	4.33046	4.37721	4.37943
hsa-miR-6820-5p	0.0377971	0.991158	4.41243	4.42771	4.45753	4.46147
hsa-miR-4668-3p	0.0126022	0.99125	4.3818	4.37954	4.42358	4.41511
hsa-miR-99a-3p	0.0381547	0.991461	4.34094	4.33786	4.38413	4.36942
hsa-miR-6740-3p	0.00170897	0.991482	4.33891	4.34053	4.37569	4.37832
hsa-miR-7848-3p	0.0435583	0.991623	4.34546	4.34409	4.37359	4.38937
hsa-miR-487b-3p	0.0300676	0.9917	4.36649	4.36259	4.39489	4.40725
hsa-miR-4453	0.028688	0.991773	4.35256	4.34933	4.381	4.39307
hsa-miR-1-5p	0.0259568	0.991993	4.42404	4.41414	4.45162	4.4579
hsa-miR-4438	0.0199888	0.99205	4.32301	4.33109	4.35882	4.36463
hsa-miR-3150a-3p	0.0388588	0.992112	4.33583	4.32282	4.36118	4.3663
hsa-miR-6823-5p	0.0178728	0.992181	4.3561	4.34879	4.38962	4.38388
hsa-miR-377-5p	0.0259572	0.992212	4.37231	4.37192	4.41207	4.4008
hsa-miR-518f-5p	0.00597141	0.993482	4.34453	4.34833	4.37608	4.37382
hsa-miR-6820-3p	0.0150518	0.993495	4.37498	4.36789	4.39992	4.40019
hsa-miR-1269a	0.0178448	0.993651	4.32794	4.33287	4.35526	4.3609
hsa-miR-7151-3p	0.0264905	0.993752	4.36217	4.36001	4.39293	4.38409
hsa-miR-548d-3p	0.0169472	0.993911	4.3775	4.3837	4.40914	4.40573
hsa-miR-593-5p	0.00236304	0.994025	4.31952	4.31704	4.34448	4.34399
hsa-miR-486-3p	0.0207133	0.994299	4.33846	4.34544	4.36581	4.36788
hsa-miR-101-5p	0.0458515	0.994523	4.38995	4.39624	4.42164	4.41294
hsa-miR-4636	0.0342039	0.994881	4.38091	4.37259	4.40026	4.39828
hsa-miR-139-5p	0.0268501	0.995083	4.34071	4.33948	4.36507	4.358
hsa-miR-1250-3p	0.0242507	0.995226	4.40296	4.4077	4.42883	4.42409
hsa-miR-411-5p	0.0449281	0.99545	4.3394	4.34793	4.3644	4.36264
hsa-miR-8088	0.0194527	0.995906	4.37479	4.37952	4.39422	4.39608
hsa-miR-3116	0.0403719	0.99593	4.34765	4.34814	4.36934	4.36199
hsa-miR-3974	0.0411771	0.995985	4.39307	4.3962	4.40898	4.41571
hsa-miR-4667-3p	0.0142924	0.996307	4.38153	4.38494	4.39851	4.40045
hsa-miR-1292-3p	0.033713	0.996438	4.34423	4.33934	4.35891	4.3557
hsa-miR-105-5p	0.0267405	0.996462	4.35915	4.36429	4.37748	4.37694
hsa-miR-302c-3p	8.849e-05	0.996478	4.42714	4.42694	4.44279	4.44258
hsa-miR-3191-5p	0.040511	0.996564	4.34043	4.33646	4.35101	4.35579
hsa-miR-4490	0.0415607	0.997239	4.35547	4.35042	4.36475	4.36524
hsa-miR-5590-3p	0.014868	0.997933	4.39979	4.39938	4.4098	4.40759
hsa-miR-6867-5p	0.0125861	1.06923	5.77443	5.82849	5.39297	5.45868
hsa-miR-4778-5p	0.00136143	1.06807	5.24324	5.25492	4.92544	4.90366
hsa-miR-6829-5p	0.0229362	1.04096	5.17688	5.13102	4.92989	4.97237
hsa-miR-6775-5p	0.0166859	1.04047	5.40586	5.4526	5.23277	5.20331
hsa-miR-4669	0.0463939	1.02983	5.47353	5.40973	5.26918	5.29885
hsa-miR-4667-5p	0.0149134	1.02256	4.65329	4.67732	4.55821	4.56653
hsa-miR-6865-5p	0.0184919	1.01595	4.78527	4.76551	4.70347	4.69737
hsa-miR-3190-3p	0.0335473	1.0156	4.50101	4.49178	4.43947	4.41521
hsa-miR-6815-5p	0.0336475	1.01508	4.46035	4.44699	4.39803	4.37702
hsa-miR-802	0.030026	1.0128	4.43159	4.43492	4.387	4.36741
hsa-miR-4477a	0.0419788	1.01246	4.4663	4.44942	4.41098	4.39506
hsa-miR-3619-3p	0.00116723	1.01219	4.35732	4.36074	4.30707	4.30597
hsa-miR-6746-3p	0.0156826	1.01116	4.35628	4.3572	4.30257	4.31472
hsa-miR-6786-3p	0.0477318	1.01092	4.41046	4.38921	4.35049	4.3541
hsa-miR-5095	0.0428469	1.01076	4.36819	4.34855	4.31343	4.31049
hsa-miR-6859-5p	0.0166965	1.01046	4.47047	4.48213	4.43163	4.4283
hsa-miR-613	0.0303653	1.00999	4.40214	4.40537	4.35259	4.36779
hsa-miR-520h	0.0403152	1.0099	4.41926	4.40355	4.36388	4.37247
hsa-miR-4756-5p	0.0106478	1.00956	4.39198	4.39191	4.35468	4.34603
hsa-miR-6889-5p	0.0482574	1.00949	4.37762	4.39406	4.34008	4.34918
hsa-miR-4473	0.0163131	1.00945	4.40554	4.3957	4.35736	4.36145
hsa-miR-378b	0.0266853	1.00915	4.41101	4.41037	4.37735	4.36403
hsa-miR-4422	0.0462812	1.00901	4.37145	4.36178	4.33485	4.32041
hsa-miR-6839-5p	0.0292097	1.0087	4.41227	4.40963	4.37943	4.36641
hsa-miR-34c-3p	0.043282	1.00823	4.34132	4.3507	4.30452	4.31656
hsa-miR-4666a-3p	0.00752745	1.00812	4.44054	4.44389	4.40907	4.4038
hsa-miR-548a-5p	0.0379462	1.00804	4.47712	4.46301	4.43323	4.43557
hsa-miR-4319	0.00481647	1.00798	4.35607	4.3598	4.32497	4.32195
hsa-miR-4445-5p	0.0452866	1.00757	4.3905	4.405	4.36537	4.36403
hsa-miR-6735-5p	0.0326459	1.00733	4.3894	4.3781	4.35009	4.35357
hsa-miR-4740-3p	0.0222791	1.00709	4.40904	4.40034	4.37549	4.3719
hsa-let-7i-3p	0.0393988	1.0067	4.36492	4.36169	4.33999	4.32856
hsa-miR-4755-3p	0.0311834	1.00621	4.40604	4.40303	4.37265	4.38202
hsa-miR-555	0.0430383	1.00586	4.35608	4.36222	4.33824	4.32924
hsa-miR-616-5p	0.0241793	1.00571	4.37317	4.3677	4.34279	4.34843
hsa-miR-3163	0.0356839	1.00539	4.40051	4.40675	4.38337	4.37666
hsa-miR-4670-5p	0.0143267	1.00494	4.38318	4.38705	4.3618	4.3653
hsa-miR-876-5p	0.0373625	1.00405	4.42408	4.42701	4.40448	4.41094
hsa-miR-27b-5p	0.0167825	1.00399	4.36689	4.36359	4.34946	4.34632
hsa-miR-4292	0.0488116	1.00397	4.30955	4.30886	4.29606	4.28827
hsa-miR-889-5p	0.0414914	1.00331	4.39751	4.39912	4.38088	4.38676
hsa-miR-4256	0.00394621	1.00306	4.38416	4.3837	4.37136	4.36973
hsa-miR-3607-5p	0.0157584	1.003	4.38188	4.38515	4.37073	4.37008
hsa-miR-518d-3p	0.0212474	1.002	4.374	4.37284	4.36353	4.36584
hsa-miR-3140-5p	0.0175356	1.00085	4.40542	4.40625	4.40239	4.40182

## Sheet: Supplementary table 2
Name	Sequences (5,-3,)
hsa-miR-621
Forward primer	GCTAGCAACAGCGCTT
Reverse primer	GGTCCAGTTTTTTTTTTTTTTTAGGT
hsa-miR-645
Forward primer	GCAGTCTAGGCTGGTACT
Reverse primer	TCCAGTTTTTTTTTTTTTTTCAGCA
hsa-miR-3178
Forward primer	GCGCGGCCGGA
Reverse primer	GGTCCAGTTTTTTTTTTTTTTTCGAT
hsa-miR-299-5p
Forward primer	CAGTGGTTTACCGTCCCA
Reverse primer	GGTCCAGTTTTTTTTTTTTTTTATGTATGT
hsa-miR-1269a
Forward primer	GACTGAGCCGTGCTAC
Reverse primer	GGTCCAGTTTTTTTTTTTTTTTCCA
hsa-miR-486-3p
Forward primer	GGGGCAGCTCAGTACA
Reverse primer	GGTCCAGTTTTTTTTTTTTTTTATCCT
hsa-miR-139-5p
Forward primer	GTCTACAGTGCACGTGTC
Reverse primer	CCAGTTTTTTTTTTTTTTTACTGGAG
hsa-miR-5590-3p
Forward primer	AGCGCAGAATAAAGTTCATGT
Reverse primer	TCCAGTTTTTTTTTTTTTTTGCCA
hsa-miR-802
Forward primer	GCAGCAGTAACAAAGATTCATC
Reverse primer	GGTCCAGTTTTTTTTTTTTTTTACAAG
hsa-miR-613
Forward primer	CGCAGAGGAATGTTCCTTCT
Reverse primer	TCCAGTTTTTTTTTTTTTTTGGCA
hsa-miR-4756-5p
Forward primer	GAGGCGCTCACTCTCT
Reverse primer	GGTCCAGTTTTTTTTTTTTTTTAGCA
hsa-miR-34c-3p
Forward primer	CGCAGAATCACTAACCACAC
Reverse primer	GGTCCAGTTTTTTTTTTTTTTTCCT
hsa-miR-4319
Forward primer	GCAGTCCCTGAGCAAAG
Reverse primer	GGTCCAGTTTTTTTTTTTTTTTGTG
hsa-miR-555
Forward primer	CAGAGGGTAAGCTGAACCT
Reverse primer	GGTCCAGTTTTTTTTTTTTTTTATCAGA
hsa-miR-3163
Forward primer	GCAGTATAAAATGAGGGCAGT
Reverse primer	GGTCCAGTTTTTTTTTTTTTTTGTCT
hsa-miR-876-5p
Forward primer	CGCAGTGGATTTCTTTGTGA
Reverse primer	GTCCAGTTTTTTTTTTTTTTTGGTG

## Sheet: Supplementary table 3
miRNA	gene_symbol	TargetScan	miRDB	miRTarbase	Tarbase
hsa-miR-3178	AAED1	+	-	-	-
hsa-miR-3178	ABCB5	-	+	-	-
hsa-miR-3178	ABCC1	+	-	-	-
hsa-miR-3178	ABCF2	+	-	-	-
hsa-miR-3178	ABLIM2	+	-	-	+
hsa-miR-3178	AC005481.5	+	-	-	-
hsa-miR-3178	AC007390.5	+	-	-	-
hsa-miR-3178	AC012360.2	+	-	-	-
hsa-miR-3178	AC019294.1	+	-	-	-
hsa-miR-3178	AC024940.1	+	-	-	-
hsa-miR-3178	AC025278.1	+	-	-	-
hsa-miR-3178	AC074389.6	+	-	-	-
hsa-miR-3178	AC103801.2	+	-	-	-
hsa-miR-3178	AC104667.3	+	-	-	-
hsa-miR-3178	AC104841.2	+	-	-	-
hsa-miR-3178	AC105020.1	+	-	-	-
hsa-miR-3178	AC129492.6	+	-	-	-
hsa-miR-3178	ACAP3	+	-	-	+
hsa-miR-3178	ADAMTS17	+	-	-	+
hsa-miR-3178	ADAMTSL2	-	-	-	+
hsa-miR-3178	ADIPOQ	+	-	-	-
hsa-miR-3178	AGAP3	-	+	-	+
hsa-miR-3178	AGFG2	+	-	-	-
hsa-miR-3178	AGPAT2	+	-	-	-
hsa-miR-3178	AGPAT3	+	+	-	+
hsa-miR-3178	AGPAT6	-	-	+	-
hsa-miR-3178	AGRN	+	+	-	-
hsa-miR-3178	AKIP1	-	+	+	-
hsa-miR-3178	AL050303.1	+	-	-	-
hsa-miR-3178	AL591479.1	+	-	-	-
hsa-miR-3178	ALPP	+	+	-	-
hsa-miR-3178	ALX4	-	-	-	+
hsa-miR-3178	AMH	+	+	-	-
hsa-miR-3178	ANK1	-	-	-	+
hsa-miR-3178	AP000867.1	+	-	-	-
hsa-miR-3178	AP001579.1	+	-	-	-
hsa-miR-3178	AP001631.10	+	-	-	-
hsa-miR-3178	AP5S1	+	-	-	-
hsa-miR-3178	APBA1	+	+	-	+
hsa-miR-3178	APC2	-	-	-	+
hsa-miR-3178	APPL1	-	+	-	-
hsa-miR-3178	AQP2	+	-	-	-
hsa-miR-3178	AQP6	+	+	+	-
hsa-miR-3178	ARFGAP1	-	-	-	+
hsa-miR-3178	ARHGAP22	+	-	-	-
hsa-miR-3178	ARHGAP39	+	-	-	+
hsa-miR-3178	ARHGEF17	-	-	-	+
hsa-miR-3178	ARL4C	+	+	-	+
hsa-miR-3178	ARL5C	+	-	-	-
hsa-miR-3178	ARRDC1	+	-	-	-
hsa-miR-3178	ARSD	+	-	-	-
hsa-miR-3178	ARX	+	+	-	-
hsa-miR-3178	ASB6	-	-	+	-
hsa-miR-3178	ATN1	+	-	-	-
hsa-miR-3178	ATP4B	+	-	-	-
hsa-miR-3178	ATP6V0E1	-	-	+	-
hsa-miR-3178	ATPIF1	-	-	-	+
hsa-miR-3178	AUNIP	-	+	-	-
hsa-miR-3178	AVP	+	-	-	-
hsa-miR-3178	B4GALT1	-	-	-	+
hsa-miR-3178	BAIAP3	-	-	-	+
hsa-miR-3178	BANP	+	-	-	-
hsa-miR-3178	BARHL1	+	-	+	+
hsa-miR-3178	BARX1	-	-	-	+
hsa-miR-3178	BATF	+	-	-	-
hsa-miR-3178	BAZ2B	-	-	+	-
hsa-miR-3178	BBC3	-	-	-	+
hsa-miR-3178	BCAT2	-	-	-	+
hsa-miR-3178	BCKDHB	+	-	-	-
hsa-miR-3178	BCL7C	-	-	-	+
hsa-miR-3178	BCR	-	-	-	+
hsa-miR-3178	BEAN1	+	-	-	-
hsa-miR-3178	BEST4	+	-	-	-
hsa-miR-3178	BICD1	-	-	-	+
hsa-miR-3178	BIN1	-	-	-	+
hsa-miR-3178	BRSK2	+	-	-	-
hsa-miR-3178	BTBD19	+	-	-	-
hsa-miR-3178	BVES	+	+	+	-
hsa-miR-3178	C11orf80	+	-	-	-
hsa-miR-3178	C11orf9	-	-	-	+
hsa-miR-3178	C11orf95	-	+	-	-
hsa-miR-3178	C11orf96	-	+	-	-
hsa-miR-3178	C12orf61	-	-	-	+
hsa-miR-3178	C12orf68	+	-	-	-
hsa-miR-3178	C15ORF37	+	-	-	-
hsa-miR-3178	C15orf56	+	-	-	-
hsa-miR-3178	C16orf90	+	-	-	-
hsa-miR-3178	C17orf50	+	-	-	-
hsa-miR-3178	C17orf82	+	-	-	-
hsa-miR-3178	C19orf26	+	-	-	-
hsa-miR-3178	C19orf35	+	+	+	+
hsa-miR-3178	C19orf6	-	-	-	+
hsa-miR-3178	C19orf60	+	-	-	+
hsa-miR-3178	C19orf66	+	-	-	-
hsa-miR-3178	C19orf81	-	-	-	+
hsa-miR-3178	C1orf170	+	-	-	-
hsa-miR-3178	C1orf200	-	-	-	+
hsa-miR-3178	C1orf229	+	-	-	-
hsa-miR-3178	C1orf95	-	-	-	+
hsa-miR-3178	C1QL1	+	+	-	+
hsa-miR-3178	C20orf151	-	-	-	+
hsa-miR-3178	C20orf201	+	-	-	-
hsa-miR-3178	C22orf24	+	-	-	-
hsa-miR-3178	C2CD3	+	-	-	-
hsa-miR-3178	C2orf82	+	-	-	-
hsa-miR-3178	C4orf26	+	-	-	-
hsa-miR-3178	C6orf223	+	-	-	-
hsa-miR-3178	C6orf25	-	-	+	-
hsa-miR-3178	C8orf82	+	+	-	-
hsa-miR-3178	C9orf117	+	-	-	-
hsa-miR-3178	C9orf62	+	-	-	-
hsa-miR-3178	C9orf69	+	-	-	-
hsa-miR-3178	CABP1	+	-	-	-
hsa-miR-3178	CACFD1	+	-	-	-
hsa-miR-3178	CACNA1C	+	-	-	-
hsa-miR-3178	CACNG7	+	+	-	+
hsa-miR-3178	CALML3	+	-	-	-
hsa-miR-3178	CAMTA2	+	+	-	-
hsa-miR-3178	CASC4	+	-	-	-
hsa-miR-3178	CASKIN1	+	-	-	+
hsa-miR-3178	CASP1	+	-	-	-
hsa-miR-3178	CASP16	+	-	-	-
hsa-miR-3178	CASZ1	-	+	-	+
hsa-miR-3178	CBFA2T3	+	-	-	+
hsa-miR-3178	CCDC106	+	-	-	-
hsa-miR-3178	CCDC122	+	+	+	-
hsa-miR-3178	CCL28	+	-	-	-
hsa-miR-3178	CCNY	+	-	-	-
hsa-miR-3178	CD209	+	-	-	-
hsa-miR-3178	CD3E	+	-	-	+
hsa-miR-3178	CD40	+	-	-	-
hsa-miR-3178	CDC37	+	-	-	-
hsa-miR-3178	CDC42EP5	+	-	-	-
hsa-miR-3178	CDC6	+	+	-	-
hsa-miR-3178	CDH11	+	-	-	-
hsa-miR-3178	CDH7	-	-	+	-
hsa-miR-3178	CDK5R2	+	+	-	+
hsa-miR-3178	CDR2L	-	-	-	+
hsa-miR-3178	CDT1	-	-	-	+
hsa-miR-3178	CEACAM8	+	-	-	-
hsa-miR-3178	CEBPB	+	-	-	+
hsa-miR-3178	CEBPD	+	-	-	-
hsa-miR-3178	CELF5	-	+	-	+
hsa-miR-3178	CELSR2	-	+	-	+
hsa-miR-3178	CEP57L1	-	-	+	-
hsa-miR-3178	CERS1	+	-	-	-
hsa-miR-3178	CES4A	+	-	-	-
hsa-miR-3178	CHD5	-	-	-	+
hsa-miR-3178	CHEK2	+	-	-	-
hsa-miR-3178	CHST10	+	-	-	-
hsa-miR-3178	CIT	+	-	-	-
hsa-miR-3178	CITED4	+	-	-	-
hsa-miR-3178	CLCN3	-	-	-	+
hsa-miR-3178	CLDN4	+	-	-	-
hsa-miR-3178	CLEC4G	+	-	-	+
hsa-miR-3178	CNBP	-	+	-	-
hsa-miR-3178	CNN1	+	-	-	-
hsa-miR-3178	CNTD2	+	+	-	-
hsa-miR-3178	COL5A1	+	-	-	+
hsa-miR-3178	CORO1B	+	-	-	-
hsa-miR-3178	COX6B2	+	-	-	-
hsa-miR-3178	COX7B	+	-	-	-
hsa-miR-3178	CPEB1	+	-	-	-
hsa-miR-3178	CPLX1	+	+	+	+
hsa-miR-3178	CREM	-	-	-	+
hsa-miR-3178	CRX	-	-	+	-
hsa-miR-3178	CSK	-	-	-	+
hsa-miR-3178	CSTF1	-	-	+	-
hsa-miR-3178	CTAG2	-	-	-	+
hsa-miR-3178	CTC-260F20.3	+	-	-	-
hsa-miR-3178	CTXN1	+	-	-	-
hsa-miR-3178	CXCL14	-	-	-	+
hsa-miR-3178	CYGB	+	-	-	-
hsa-miR-3178	CYP1A2	+	+	-	-
hsa-miR-3178	CYP4F22	-	-	-	+
hsa-miR-3178	DDR1	-	-	-	+
hsa-miR-3178	DENND6B	-	-	+	-
hsa-miR-3178	DFFB	+	-	-	-
hsa-miR-3178	DGCR6	+	-	-	-
hsa-miR-3178	DIO3	+	+	-	-
hsa-miR-3178	DKFZP761J1410	+	-	-	-
hsa-miR-3178	DKFZP779L1853	+	-	-	-
hsa-miR-3178	DMPK	+	+	-	-
hsa-miR-3178	DNA2	-	-	+	-
hsa-miR-3178	DNAJC9-AS1	-	-	-	+
hsa-miR-3178	DOK3	+	-	-	-
hsa-miR-3178	DOT1L	+	-	-	+
hsa-miR-3178	DPF1	+	-	-	-
hsa-miR-3178	DTX3L	+	-	-	-
hsa-miR-3178	DUOXA1	-	-	-	+
hsa-miR-3178	DUSP15	+	-	-	-
hsa-miR-3178	DUSP8	-	-	-	+
hsa-miR-3178	DZIP1	-	+	-	-
hsa-miR-3178	E4F1	-	-	-	+
hsa-miR-3178	ECHDC3	+	-	-	-
hsa-miR-3178	EEF1A2	+	-	-	+
hsa-miR-3178	EFCAB4B	+	-	-	-
hsa-miR-3178	EFHC2	-	+	-	-
hsa-miR-3178	EFNB1	-	-	-	+
hsa-miR-3178	EGR4	-	-	-	+
hsa-miR-3178	EID2B	+	-	-	-
hsa-miR-3178	EIF2AK2	+	-	-	-
hsa-miR-3178	EIF3B	+	-	-	-
hsa-miR-3178	ELOVL1	+	-	-	-
hsa-miR-3178	ELP2	-	-	+	-
hsa-miR-3178	EMILIN1	+	-	-	-
hsa-miR-3178	ENSG00000270466	+	-	-	-
hsa-miR-3178	EPG5	-	-	+	-
hsa-miR-3178	EPS8L2	+	-	-	-
hsa-miR-3178	ERG	-	-	-	+
hsa-miR-3178	EVI5L	+	+	-	+
hsa-miR-3178	EVX1	+	-	-	-
hsa-miR-3178	EVX2	-	-	-	+
hsa-miR-3178	FAIM2	-	-	-	+
hsa-miR-3178	FAM109B	+	-	-	-
hsa-miR-3178	FAM118A	+	-	-	-
hsa-miR-3178	FAM127A	-	-	-	+
hsa-miR-3178	FAM186B	+	-	-	-
hsa-miR-3178	FAM19A5	+	-	-	-
hsa-miR-3178	FAM219A	+	+	-	+
hsa-miR-3178	FAM57B	+	+	-	-
hsa-miR-3178	FASTK	-	-	-	+
hsa-miR-3178	FBXL16	+	-	-	+
hsa-miR-3178	FBXL8	+	-	-	-
hsa-miR-3178	FBXO44	-	+	-	+
hsa-miR-3178	FCRLB	+	-	-	-
hsa-miR-3178	FDXACB1	+	-	-	-
hsa-miR-3178	FEM1A	+	-	-	-
hsa-miR-3178	FERMT1	-	-	-	+
hsa-miR-3178	FEZF1	+	-	-	-
hsa-miR-3178	FGD2	+	-	-	-
hsa-miR-3178	FGD5	-	-	-	+
hsa-miR-3178	FLJ27365	+	-	-	-
hsa-miR-3178	FLNC	-	+	-	+
hsa-miR-3178	FOXB1	+	-	-	-
hsa-miR-3178	FOXD1	+	-	-	-
hsa-miR-3178	FOXD3	+	+	-	+
hsa-miR-3178	FOXE3	-	-	-	+
hsa-miR-3178	FOXK1	-	-	-	+
hsa-miR-3178	FOXL2	+	-	-	-
hsa-miR-3178	FOXN3-AS1	-	-	-	+
hsa-miR-3178	FOXO6	+	-	-	+
hsa-miR-3178	FREAC-4	-	+	-	-
hsa-miR-3178	FTSJ2	+	-	-	-
hsa-miR-3178	FXYD1	+	+	+	-
hsa-miR-3178	FZD8	+	-	-	-
hsa-miR-3178	FZD9	-	-	-	+
hsa-miR-3178	G6PD	+	-	-	-
hsa-miR-3178	GAS1	+	-	-	-
hsa-miR-3178	GDF6	-	-	-	+
hsa-miR-3178	GDF7	+	-	-	-
hsa-miR-3178	GGACT	+	-	-	-
hsa-miR-3178	GIT1	-	-	-	+
hsa-miR-3178	GJC2	-	-	-	+
hsa-miR-3178	GMEB2	-	-	-	+
hsa-miR-3178	GNA11	+	-	-	+
hsa-miR-3178	GNA12	-	-	-	+
hsa-miR-3178	GPI	-	+	-	+
hsa-miR-3178	GPR108	+	-	-	-
hsa-miR-3178	GPR137	-	-	-	+
hsa-miR-3178	GRAMD1A	+	-	-	-
hsa-miR-3178	GREB1	+	-	-	-
hsa-miR-3178	GRIK3	-	-	-	+
hsa-miR-3178	GRIK4	-	-	-	+
hsa-miR-3178	GRIN2D	-	-	-	+
hsa-miR-3178	GUCD1	+	-	-	-
hsa-miR-3178	H2AFX	-	-	-	+
hsa-miR-3178	H6PD	+	-	-	+
hsa-miR-3178	HAS1	-	-	-	+
hsa-miR-3178	HAVCR1	+	-	-	-
hsa-miR-3178	HCN2	+	-	-	+
hsa-miR-3178	HDAC10	+	+	-	-
hsa-miR-3178	HDAC4	-	-	-	+
hsa-miR-3178	HEPN1	+	-	-	-
hsa-miR-3178	HES4	+	-	-	-
hsa-miR-3178	HES5	+	-	-	+
hsa-miR-3178	HIC1	-	-	-	+
hsa-miR-3178	HIST2H2BE	+	-	-	-
hsa-miR-3178	HIST2H3A	+	-	-	-
hsa-miR-3178	HIST2H3C	+	-	-	-
hsa-miR-3178	HLCS	+	-	-	-
hsa-miR-3178	HNF1A	-	-	-	+
hsa-miR-3178	HOOK2	+	-	-	-
hsa-miR-3178	HOOK3	+	-	+	-
hsa-miR-3178	HOXA1	+	+	-	-
hsa-miR-3178	HOXB6	+	-	-	-
hsa-miR-3178	HOXB8	+	+	-	+
hsa-miR-3178	HOXC5	+	-	-	+
hsa-miR-3178	HOXD3	+	+	-	-
hsa-miR-3178	HOXD9	-	-	-	+
hsa-miR-3178	HSD17B1	+	+	-	-
hsa-miR-3178	ICAM4	+	-	-	+
hsa-miR-3178	ID3	-	-	-	+
hsa-miR-3178	IER2	+	-	-	-
hsa-miR-3178	IER3	+	-	-	-
hsa-miR-3178	IFNLR1	+	-	-	-
hsa-miR-3178	IGDCC3	-	-	-	+
hsa-miR-3178	IL17D	+	-	-	-
hsa-miR-3178	IL17RE	+	+	-	-
hsa-miR-3178	INHBE	+	-	-	-
hsa-miR-3178	INSM1	-	-	-	+
hsa-miR-3178	IRAK3	-	-	+	-
hsa-miR-3178	IRGQ	-	-	-	+
hsa-miR-3178	ISLR2	+	+	-	+
hsa-miR-3178	IYD	-	-	-	+
hsa-miR-3178	JOSD2	+	-	-	-
hsa-miR-3178	JUN	+	-	+	+
hsa-miR-3178	JUNB	+	-	-	-
hsa-miR-3178	JUND	-	-	-	+
hsa-miR-3178	KANK2	+	-	-	-
hsa-miR-3178	KCNC3	+	-	-	+
hsa-miR-3178	KCNE1L	+	-	-	-
hsa-miR-3178	KCNE5	-	+	-	+
hsa-miR-3178	KCNN4	-	-	-	+
hsa-miR-3178	KCNQ1	-	-	-	+
hsa-miR-3178	KCTD12	+	-	-	-
hsa-miR-3178	KDM6B	-	-	+	-
hsa-miR-3178	KIAA0087	+	-	-	-
hsa-miR-3178	KIAA0754	+	-	+	+
hsa-miR-3178	KIAA0825	-	+	-	-
hsa-miR-3178	KIAA1456	-	-	+	-
hsa-miR-3178	KIAA1586	+	-	-	-
hsa-miR-3178	KIF18B	+	-	-	-
hsa-miR-3178	KIF26B	-	-	-	+
hsa-miR-3178	KIN	-	+	-	-
hsa-miR-3178	KLC2	+	-	-	-
hsa-miR-3178	KLF16	+	-	-	-
hsa-miR-3178	KLHL26	+	+	-	-
hsa-miR-3178	KLK9	+	+	-	-
hsa-miR-3178	KLLN	+	+	-	-
hsa-miR-3178	KMT2D	-	-	-	+
hsa-miR-3178	L2HGDH	+	-	-	-
hsa-miR-3178	LCMT2	+	-	-	-
hsa-miR-3178	LCN6	+	-	-	-
hsa-miR-3178	LCNL1	+	-	-	-
hsa-miR-3178	LDOC1	+	+	-	+
hsa-miR-3178	LETM1	+	-	-	+
hsa-miR-3178	LFNG	-	-	-	+
hsa-miR-3178	LHX3	-	-	-	+
hsa-miR-3178	LLGL1	+	-	-	-
hsa-miR-3178	LOC100130705	-	+	-	-
hsa-miR-3178	LOC102724828	-	+	-	-
hsa-miR-3178	LPAR5	-	-	-	+
hsa-miR-3178	LRCH3	+	-	-	-
hsa-miR-3178	LRFN1	+	-	-	+
hsa-miR-3178	LRRC14	+	+	-	-
hsa-miR-3178	LRRC25	+	-	-	-
hsa-miR-3178	LRRN4CL	+	-	-	-
hsa-miR-3178	LTBP4	+	-	-	-
hsa-miR-3178	LY6K	+	-	-	-
hsa-miR-3178	MACROD1	+	-	-	-
hsa-miR-3178	MAFB	+	-	-	-
hsa-miR-3178	MAFG	+	-	-	-
hsa-miR-3178	MAL	-	-	-	+
hsa-miR-3178	MALL	+	-	+	-
hsa-miR-3178	MAN1C1	-	-	-	+
hsa-miR-3178	MAP2K7	+	+	-	+
hsa-miR-3178	MAP3K10	-	-	-	+
hsa-miR-3178	MAPK11	+	-	-	-
hsa-miR-3178	MAPK12	+	-	-	-
hsa-miR-3178	MAPK4	+	-	-	-
hsa-miR-3178	MAPKAPK2	+	-	-	-
hsa-miR-3178	MAPKBP1	+	-	-	-
hsa-miR-3178	MARVELD1	+	+	-	+
hsa-miR-3178	MARVELD2	+	-	-	-
hsa-miR-3178	MAST3	+	-	+	+
hsa-miR-3178	MBOAT1	-	-	+	-
hsa-miR-3178	MCF2L	+	+	-	+
hsa-miR-3178	MCF2L2	+	+	-	-
hsa-miR-3178	MCOLN1	+	+	-	-
hsa-miR-3178	MDFI	-	-	-	+
hsa-miR-3178	MDM4	+	-	+	-
hsa-miR-3178	MED16	+	-	-	-
hsa-miR-3178	MED28	-	-	+	-
hsa-miR-3178	MEF2D	-	-	-	+
hsa-miR-3178	METTL8	+	-	-	-
hsa-miR-3178	MEX3B	+	-	-	-
hsa-miR-3178	MGAT1	-	-	-	+
hsa-miR-3178	MGRN1	-	-	-	+
hsa-miR-3178	MIB2	+	+	-	-
hsa-miR-3178	MIDN	+	-	-	+
hsa-miR-3178	MINOS1	-	-	-	+
hsa-miR-3178	MOAP1	+	-	-	-
hsa-miR-3178	MRC2	+	-	-	+
hsa-miR-3178	MRPL12	+	-	-	-
hsa-miR-3178	MRPL23	+	+	-	-
hsa-miR-3178	MRPL49	+	-	-	-
hsa-miR-3178	MSC	+	-	-	+
hsa-miR-3178	MSI1	+	-	-	-
hsa-miR-3178	MTA3	-	-	-	+
hsa-miR-3178	MTCH1	+	-	-	-
hsa-miR-3178	MTHFSD	+	-	-	+
hsa-miR-3178	MVK	+	-	-	-
hsa-miR-3178	MXD1	-	+	-	-
hsa-miR-3178	MYO9B	+	-	-	-
hsa-miR-3178	MYOD1	+	+	-	+
hsa-miR-3178	NANOG	+	-	-	-
hsa-miR-3178	NAT8L	+	-	-	-
hsa-miR-3178	NCCRP1	+	-	-	-
hsa-miR-3178	NCK2	+	-	-	+
hsa-miR-3178	NCOR2	-	-	+	-
hsa-miR-3178	NDOR1	+	-	-	-
hsa-miR-3178	NDUFS7	+	-	-	-
hsa-miR-3178	NEIL2	+	-	-	-
hsa-miR-3178	NFAM1	-	-	-	+
hsa-miR-3178	NFIC	+	+	-	-
hsa-miR-3178	NFIX	-	-	-	+
hsa-miR-3178	NICN1	+	-	+	-
hsa-miR-3178	NKAIN4	+	-	-	+
hsa-miR-3178	NKX2-8	+	-	-	-
hsa-miR-3178	NKX3-2	-	-	-	+
hsa-miR-3178	NLRP1	+	-	-	-
hsa-miR-3178	NOL9	-	-	+	-
hsa-miR-3178	NOTCH1	-	-	-	+
hsa-miR-3178	NPBWR1	+	-	-	-
hsa-miR-3178	NPTXR	+	-	-	-
hsa-miR-3178	NRARP	+	+	-	-
hsa-miR-3178	NRG2	+	-	-	-
hsa-miR-3178	NRN1	+	+	-	-
hsa-miR-3178	NT5C3B	+	-	-	-
hsa-miR-3178	NTF4	+	-	-	-
hsa-miR-3178	NTN5	+	-	-	-
hsa-miR-3178	NUAK2	+	-	-	+
hsa-miR-3178	NUMBL	-	-	-	+
hsa-miR-3178	NXF1	+	-	-	-
hsa-miR-3178	OLIG1	+	+	-	+
hsa-miR-3178	OLIG2	+	-	-	+
hsa-miR-3178	OR4N2	+	-	-	-
hsa-miR-3178	ORAI2	-	-	+	+
hsa-miR-3178	OSBPL10	+	+	-	-
hsa-miR-3178	OTP	+	-	-	-
hsa-miR-3178	PABPC1L	-	-	-	+
hsa-miR-3178	PALM	+	-	-	-
hsa-miR-3178	PAOX	+	-	-	-
hsa-miR-3178	PAPPA	-	-	-	+
hsa-miR-3178	PARD6B	+	-	-	-
hsa-miR-3178	PAX2	+	-	-	+
hsa-miR-3178	PCDHA9	-	+	-	-
hsa-miR-3178	PCDHB11	+	-	-	-
hsa-miR-3178	PCDHGA1	-	-	-	+
hsa-miR-3178	PCDHGA10	-	-	-	+
hsa-miR-3178	PCDHGA2	-	-	-	+
hsa-miR-3178	PCDHGA4	-	-	-	+
hsa-miR-3178	PCDHGA5	-	-	-	+
hsa-miR-3178	PCDHGA6	-	-	-	+
hsa-miR-3178	PCDHGA7	-	-	-	+
hsa-miR-3178	PCDHGA8	-	-	-	+
hsa-miR-3178	PCDHGA9	-	-	-	+
hsa-miR-3178	PCDHGB1	-	-	-	+
hsa-miR-3178	PCDHGB2	-	-	-	+
hsa-miR-3178	PCDHGB3	-	-	-	+
hsa-miR-3178	PCDHGB4	-	-	-	+
hsa-miR-3178	PCDHGB6	-	-	-	+
hsa-miR-3178	PCDHGC3	-	-	-	+
hsa-miR-3178	PCDHGC4	-	-	-	+
hsa-miR-3178	PCDHGC5	-	-	-	+
hsa-miR-3178	PCYT1B	+	-	-	-
hsa-miR-3178	PDE6B	+	-	-	-
hsa-miR-3178	PEG10	-	-	-	+
hsa-miR-3178	PEX26	+	-	-	-
hsa-miR-3178	PIGQ	+	-	-	-
hsa-miR-3178	PITX1	+	+	-	-
hsa-miR-3178	PITX3	+	+	-	+
hsa-miR-3178	PLA2G2C	+	-	-	-
hsa-miR-3178	PLAC9	+	-	-	-
hsa-miR-3178	PLCXD1	+	-	-	+
hsa-miR-3178	PLD3	+	+	-	-
hsa-miR-3178	PLD4	+	-	-	-
hsa-miR-3178	PLIN1	-	+	-	-
hsa-miR-3178	PLXDC2	+	-	-	-
hsa-miR-3178	PLXNB2	+	-	-	+
hsa-miR-3178	PMEPA1	-	-	-	+
hsa-miR-3178	PNMAL2	+	-	-	-
hsa-miR-3178	PNPLA8	-	-	-	+
hsa-miR-3178	POU2F3	+	-	-	-
hsa-miR-3178	POU3F1	+	+	-	+
hsa-miR-3178	POU5F1B	+	-	-	-
hsa-miR-3178	PPIL3	+	-	-	-
hsa-miR-3178	PPP1R27	+	-	-	-
hsa-miR-3178	PPP1R37	-	-	-	+
hsa-miR-3178	PPP2R2A	-	-	-	+
hsa-miR-3178	PRDM12	+	+	-	+
hsa-miR-3178	PREX2	+	-	-	-
hsa-miR-3178	PRR18	+	-	-	-
hsa-miR-3178	PRRT2	+	-	-	+
hsa-miR-3178	PSPH	+	+	-	-
hsa-miR-3178	PTCHD1	-	-	+	-
hsa-miR-3178	PTCHD4	-	+	-	-
hsa-miR-3178	PTDSS2	-	-	+	-
hsa-miR-3178	PTGDR2	-	-	-	+
hsa-miR-3178	PTGIS	+	-	+	-
hsa-miR-3178	PTK6	-	-	-	+
hsa-miR-3178	R3HCC1	-	-	-	+
hsa-miR-3178	RAB11B	+	-	-	+
hsa-miR-3178	RAB21	+	-	-	-
hsa-miR-3178	RAB34	+	-	-	-
hsa-miR-3178	RAB35	+	-	-	+
hsa-miR-3178	RAB36	+	-	-	+
hsa-miR-3178	RAB3IL1	+	-	-	-
hsa-miR-3178	RAB8A	+	-	-	-
hsa-miR-3178	RABL2A	+	-	-	-
hsa-miR-3178	RABL2B	+	-	-	-
hsa-miR-3178	RAC1	-	-	-	+
hsa-miR-3178	RAD9B	+	-	-	-
hsa-miR-3178	RAI14	+	-	-	-
hsa-miR-3178	RASL10A	+	-	-	-
hsa-miR-3178	RASSF2	-	-	-	+
hsa-miR-3178	RBM22	-	-	+	-
hsa-miR-3178	RBMS2	-	-	+	-
hsa-miR-3178	RBPMS2	+	-	-	-
hsa-miR-3178	RCN3	-	-	-	+
hsa-miR-3178	REM2	+	-	-	+
hsa-miR-3178	RHOB	+	-	-	-
hsa-miR-3178	RHOG	-	-	-	+
hsa-miR-3178	RIPK1	+	-	-	-
hsa-miR-3178	RND2	+	-	-	-
hsa-miR-3178	RNF182	+	-	-	-
hsa-miR-3178	RNF40	-	-	-	+
hsa-miR-3178	RP11-834C11.12	+	-	-	-
hsa-miR-3178	RPL24	-	-	+	-
hsa-miR-3178	RPRM	+	-	-	-
hsa-miR-3178	RPS6KA2	-	-	-	+
hsa-miR-3178	RS1	+	-	-	-
hsa-miR-3178	RTBDN	+	+	-	+
hsa-miR-3178	RTN4RL1	+	-	-	-
hsa-miR-3178	RUNX1	+	-	-	-
hsa-miR-3178	RWDD2A	+	-	-	-
hsa-miR-3178	RWDD4	+	-	-	-
hsa-miR-3178	SAMD10	+	-	-	-
hsa-miR-3178	SAMM50	+	-	-	-
hsa-miR-3178	SAPCD2	-	-	-	+
hsa-miR-3178	SCAMP4	+	-	-	+
hsa-miR-3178	SCD5	+	-	-	-
hsa-miR-3178	SCLY	+	-	-	-
hsa-miR-3178	SCRT2	+	+	-	+
hsa-miR-3178	SCUBE3	+	-	-	-
hsa-miR-3178	SDF4	+	-	-	-
hsa-miR-3178	SECTM1	+	-	-	+
hsa-miR-3178	SEMA6C	-	-	-	+
hsa-miR-3178	SEPHS1	+	-	-	-
hsa-miR-3178	SEPT1	+	-	-	-
hsa-miR-3178	SEPT6	+	+	+	+
hsa-miR-3178	SERPINB9	+	-	-	-
hsa-miR-3178	SERPINE1	-	+	-	-
hsa-miR-3178	SF1	+	+	-	-
hsa-miR-3178	SFRP4	-	-	-	+
hsa-miR-3178	SFTPC	+	-	-	-
hsa-miR-3178	SH2B3	+	+	-	-
hsa-miR-3178	SH3PXD2B	+	-	-	+
hsa-miR-3178	SHB	-	+	-	-
hsa-miR-3178	SHOX2	+	-	-	-
hsa-miR-3178	SIRPB2	+	-	-	-
hsa-miR-3178	SIRT7	+	-	-	-
hsa-miR-3178	SIX2	+	-	-	+
hsa-miR-3178	SIX5	+	-	-	-
hsa-miR-3178	SKP2	+	-	-	-
hsa-miR-3178	SLC12A5	+	+	+	-
hsa-miR-3178	SLC22A17	+	-	-	-
hsa-miR-3178	SLC23A2	-	-	-	+
hsa-miR-3178	SLC25A35	-	-	-	+
hsa-miR-3178	SLC25A53	+	-	-	-
hsa-miR-3178	SLC27A4	-	-	-	+
hsa-miR-3178	SLC29A2	+	-	-	-
hsa-miR-3178	SLC29A4	+	-	-	-
hsa-miR-3178	SLC30A2	+	+	-	-
hsa-miR-3178	SLC35C1	-	-	-	+
hsa-miR-3178	SLC37A1	-	-	-	+
hsa-miR-3178	SLC45A4	-	+	-	+
hsa-miR-3178	SLCO2B1	-	-	-	+
hsa-miR-3178	SLMO1	+	-	-	-
hsa-miR-3178	SMOC1	-	-	-	+
hsa-miR-3178	SMPDL3B	+	-	-	-
hsa-miR-3178	SNAPC3	+	-	-	-
hsa-miR-3178	SNRPB	+	-	-	-
hsa-miR-3178	SNX24	+	-	-	-
hsa-miR-3178	SOBP	-	-	-	+
hsa-miR-3178	SOCS2	+	-	-	-
hsa-miR-3178	SORCS2	-	-	-	+
hsa-miR-3178	SOST	-	-	-	+
hsa-miR-3178	SOX1	+	-	-	-
hsa-miR-3178	SOX12	-	-	-	+
hsa-miR-3178	SOX7	+	+	-	-
hsa-miR-3178	SPATA2	-	-	-	+
hsa-miR-3178	SPCS3	-	-	-	+
hsa-miR-3178	SPINT1	+	-	-	-
hsa-miR-3178	SPNS1	-	-	-	+
hsa-miR-3178	SPNS2	+	-	-	-
hsa-miR-3178	SPPL2A	-	-	+	-
hsa-miR-3178	SRPX2	-	-	+	-
hsa-miR-3178	SSR3	-	-	+	-
hsa-miR-3178	STAU2	+	-	-	-
hsa-miR-3178	STC2	-	+	-	-
hsa-miR-3178	STEAP2	+	-	-	+
hsa-miR-3178	STIL	+	-	+	-
hsa-miR-3178	STK11	+	-	-	-
hsa-miR-3178	STMN3	+	-	-	-
hsa-miR-3178	STX4	+	-	+	-
hsa-miR-3178	STXBP1	-	-	-	+
hsa-miR-3178	SULT1C4	+	-	-	-
hsa-miR-3178	SUSD3	+	-	-	-
hsa-miR-3178	SV2C	+	-	-	-
hsa-miR-3178	SVIL	-	-	-	+
hsa-miR-3178	SVIP	-	-	+	-
hsa-miR-3178	SYNJ2	+	-	-	-
hsa-miR-3178	SYVN1	+	-	-	-
hsa-miR-3178	TAF1	-	-	+	-
hsa-miR-3178	TAPBP	+	+	-	-
hsa-miR-3178	TBC1D22A	-	-	-	+
hsa-miR-3178	TBC1D24	+	+	-	+
hsa-miR-3178	TEK	-	-	-	+
hsa-miR-3178	TEX22	+	-	-	-
hsa-miR-3178	TFAP2A	+	-	-	-
hsa-miR-3178	TGFB1I1	+	-	-	-
hsa-miR-3178	THPO	-	-	-	+
hsa-miR-3178	THSD4	-	-	-	+
hsa-miR-3178	TLCD1	+	-	-	-
hsa-miR-3178	TLX1	+	-	-	+
hsa-miR-3178	TLX3	+	-	-	+
hsa-miR-3178	TMEM105	-	-	+	-
hsa-miR-3178	TMEM119	+	-	-	-
hsa-miR-3178	TMEM120B	-	-	-	+
hsa-miR-3178	TMEM129	-	-	-	+
hsa-miR-3178	TMEM134	+	-	-	-
hsa-miR-3178	TMEM136	-	-	-	+
hsa-miR-3178	TMEM145	+	-	-	-
hsa-miR-3178	TMEM174	+	-	-	-
hsa-miR-3178	TMEM209	+	-	-	-
hsa-miR-3178	TMEM229B	+	-	-	-
hsa-miR-3178	TMEM239	+	-	-	-
hsa-miR-3178	TMEM259	+	-	-	-
hsa-miR-3178	TMPRSS12	+	-	-	-
hsa-miR-3178	TNFAIP8L1	+	-	-	-
hsa-miR-3178	TOLLIP	-	-	-	+
hsa-miR-3178	TOR4A	+	+	-	+
hsa-miR-3178	TPGS1	+	-	-	-
hsa-miR-3178	TRAF3	-	+	-	-
hsa-miR-3178	TRIM35	-	-	-	+
hsa-miR-3178	TRIM6	+	-	-	-
hsa-miR-3178	TRIM68	+	-	-	-
hsa-miR-3178	TSPAN18	+	+	-	+
hsa-miR-3178	TTBK1	+	-	-	+
hsa-miR-3178	TTC26	-	+	-	-
hsa-miR-3178	TTC3	-	-	-	+
hsa-miR-3178	TTC9	+	-	-	-
hsa-miR-3178	TTLL11	-	+	-	+
hsa-miR-3178	TTYH1	-	-	-	+
hsa-miR-3178	TULP1	+	-	+	+
hsa-miR-3178	TXNIP	+	-	-	-
hsa-miR-3178	U2AF2	+	-	-	-
hsa-miR-3178	UBN1	+	-	-	-
hsa-miR-3178	UGT2A3	+	-	-	-
hsa-miR-3178	ULBP3	+	-	+	-
hsa-miR-3178	UNC13A	-	-	-	+
hsa-miR-3178	UNC93B1	+	-	-	+
hsa-miR-3178	USP10	+	-	-	-
hsa-miR-3178	USP2	+	-	-	-
hsa-miR-3178	USP40	-	-	-	+
hsa-miR-3178	UTP11L	-	+	-	-
hsa-miR-3178	UTS2D	-	-	-	+
hsa-miR-3178	UTS2R	+	-	-	+
hsa-miR-3178	VAPB	+	-	-	-
hsa-miR-3178	VAV3	-	-	+	-
hsa-miR-3178	VCP	+	-	-	-
hsa-miR-3178	VGF	+	-	-	+
hsa-miR-3178	VMAC	+	-	-	-
hsa-miR-3178	VSTM2L	+	-	-	-
hsa-miR-3178	VWA1	+	-	-	-
hsa-miR-3178	VWA5B2	-	-	-	+
hsa-miR-3178	WASF2	+	-	-	-
hsa-miR-3178	WBP2	+	-	-	-
hsa-miR-3178	WBSCR16	+	-	-	-
hsa-miR-3178	WDR1	+	+	+	+
hsa-miR-3178	WDR18	+	-	-	-
hsa-miR-3178	WNT3A	-	-	-	+
hsa-miR-3178	YDJC	+	-	-	-
hsa-miR-3178	YES1	+	-	+	-
hsa-miR-3178	YIPF4	-	-	+	-
hsa-miR-3178	YME1L1	-	-	+	-
hsa-miR-3178	ZBTB3	+	-	-	-
hsa-miR-3178	ZBTB42	+	+	-	-
hsa-miR-3178	ZBTB8A	+	-	-	-
hsa-miR-3178	ZBTB8B	-	-	+	-
hsa-miR-3178	ZC3H7B	-	-	-	+
hsa-miR-3178	ZC3HAV1	-	+	-	+
hsa-miR-3178	ZFP41	+	-	-	-
hsa-miR-3178	ZFX	+	-	-	-
hsa-miR-3178	ZKSCAN3	-	-	+	-
hsa-miR-3178	ZMYM1	-	-	+	-
hsa-miR-3178	ZMYND19	-	-	-	+
hsa-miR-3178	ZNF107	-	-	+	-
hsa-miR-3178	ZNF205	+	-	-	-
hsa-miR-3178	ZNF282	+	-	-	-
hsa-miR-3178	ZNF415	+	-	-	-
hsa-miR-3178	ZNF426	-	-	+	-
hsa-miR-3178	ZNF490	-	-	+	-
hsa-miR-3178	ZNF555	-	-	-	+
hsa-miR-3178	ZNF738	+	-	-	-
hsa-miR-3178	ZNF76	+	-	-	-
hsa-miR-3178	ZNF793	+	-	-	-
hsa-miR-3178	ZNF827	-	-	-	+
hsa-miR-3178	ZNF835	+	+	-	-
hsa-miR-3178	ZNF878	+	-	-	-
hsa-miR-3178	ZSCAN10	+	-	-	-
hsa-miR-3178	ZYX	+	-	-	-
hsa-miR-363-5p	3OST2	-	+	-	-
hsa-miR-363-5p	ABCA2	+	-	-	-
hsa-miR-363-5p	ABCB8	-	-	-	+
hsa-miR-363-5p	ABCC1	+	-	-	-
hsa-miR-363-5p	ABHD12	+	-	-	-
hsa-miR-363-5p	ABHD14B	+	-	-	-
hsa-miR-363-5p	ABHD4	+	-	-	+
hsa-miR-363-5p	ABI2	-	-	+	-
hsa-miR-363-5p	ABR	-	-	-	+
hsa-miR-363-5p	AC004076.7	+	-	-	-
hsa-miR-363-5p	AC007390.5	+	-	-	-
hsa-miR-363-5p	AC008267.1	+	-	-	-
hsa-miR-363-5p	AC010325.1	-	-	-	+
hsa-miR-363-5p	AC010536.2	-	-	-	+
hsa-miR-363-5p	AC013269.5	+	-	-	-
hsa-miR-363-5p	AC024940.1	-	-	-	+
hsa-miR-363-5p	AC026703.1	+	-	-	-
hsa-miR-363-5p	AC074212.3	-	-	-	+
hsa-miR-363-5p	AC079612.1	+	-	-	-
hsa-miR-363-5p	AC110619.2	-	-	-	+
hsa-miR-363-5p	AC112721.1	+	-	-	-
hsa-miR-363-5p	AC139100.2	-	-	-	+
hsa-miR-363-5p	ACAA1	+	-	-	-
hsa-miR-363-5p	ACACB	+	+	-	+
hsa-miR-363-5p	ACADS	+	-	-	+
hsa-miR-363-5p	ACADSB	-	-	-	+
hsa-miR-363-5p	ACBD4	-	-	-	+
hsa-miR-363-5p	ACBD6	-	+	-	+
hsa-miR-363-5p	ACBD7	+	+	-	-
hsa-miR-363-5p	ACER1	+	-	-	+
hsa-miR-363-5p	ACER3	+	-	-	-
hsa-miR-363-5p	ACOX1	-	-	-	+
hsa-miR-363-5p	ACSF3	-	-	-	+
hsa-miR-363-5p	ACSL4	+	-	-	+
hsa-miR-363-5p	ACTL8	-	-	-	+
hsa-miR-363-5p	ACTR1A	-	-	-	+
hsa-miR-363-5p	ACTR3	+	-	-	-
hsa-miR-363-5p	ACVR1	-	-	-	+
hsa-miR-363-5p	ACVRL1	+	+	-	+
hsa-miR-363-5p	ADAM12	-	-	-	+
hsa-miR-363-5p	ADAM33	+	-	-	+
hsa-miR-363-5p	ADAMTS15	-	-	-	+
hsa-miR-363-5p	ADAMTS17	-	-	-	+
hsa-miR-363-5p	ADAMTS19	+	-	-	+
hsa-miR-363-5p	ADAMTSL1	-	-	-	+
hsa-miR-363-5p	ADAMTSL2	-	-	-	+
hsa-miR-363-5p	ADARB2	+	-	-	+
hsa-miR-363-5p	ADCK1	+	-	-	+
hsa-miR-363-5p	ADCY1	-	-	-	+
hsa-miR-363-5p	ADCY9	-	-	-	+
hsa-miR-363-5p	ADCYAP1R1	-	-	-	+
hsa-miR-363-5p	ADD1	-	-	-	+
hsa-miR-363-5p	ADIPOQ	-	-	+	-
hsa-miR-363-5p	ADM2	-	-	-	+
hsa-miR-363-5p	ADPRH	-	+	-	+
hsa-miR-363-5p	ADPRHL1	-	-	-	+
hsa-miR-363-5p	ADRB3	+	-	-	-
hsa-miR-363-5p	AE000662.92	+	-	-	-
hsa-miR-363-5p	AEN	+	-	-	+
hsa-miR-363-5p	AGAP3	-	-	-	+
hsa-miR-363-5p	AGBL5	-	-	-	+
hsa-miR-363-5p	AGER	+	-	-	-
hsa-miR-363-5p	AGFG2	-	-	-	+
hsa-miR-363-5p	AGPAT1	+	-	-	-
hsa-miR-363-5p	AGPAT6	-	-	-	+
hsa-miR-363-5p	AGPAT9	-	-	-	+
hsa-miR-363-5p	AGRN	-	-	-	+
hsa-miR-363-5p	AGXT2	-	-	-	+
hsa-miR-363-5p	AHDC1	-	-	-	+
hsa-miR-363-5p	AHRR	-	-	-	+
hsa-miR-363-5p	AIPL1	+	+	-	-
hsa-miR-363-5p	AJAP1	+	-	-	-
hsa-miR-363-5p	AK1	-	-	-	+
hsa-miR-363-5p	AK2	-	+	-	-
hsa-miR-363-5p	AKAP12	-	-	-	+
hsa-miR-363-5p	AKAP13	-	-	-	+
hsa-miR-363-5p	AKIP1	+	-	-	-
hsa-miR-363-5p	AKR1E2	+	-	-	-
hsa-miR-363-5p	AKT1S1	+	-	-	-
hsa-miR-363-5p	AKT2	-	-	-	+
hsa-miR-363-5p	AL049747.1	+	-	-	-
hsa-miR-363-5p	AL137145.2	-	-	-	+
hsa-miR-363-5p	AL590822.2	+	-	-	-
hsa-miR-363-5p	ALDH1B1	-	-	+	+
hsa-miR-363-5p	ALDH3A1	+	-	-	-
hsa-miR-363-5p	ALDH3B1	+	-	-	-
hsa-miR-363-5p	ALDH4A1	+	-	-	+
hsa-miR-363-5p	ALDOB	-	-	-	+
hsa-miR-363-5p	ALOX15	-	-	+	-
hsa-miR-363-5p	ALPK3	-	-	-	+
hsa-miR-363-5p	AMBRA1	-	-	-	+
hsa-miR-363-5p	AMIGO1	-	-	-	+
hsa-miR-363-5p	AMIGO3	-	-	-	+
hsa-miR-363-5p	AMOT	-	-	-	+
hsa-miR-363-5p	AMOTL1	-	-	-	+
hsa-miR-363-5p	AMOTL2	-	-	-	+
hsa-miR-363-5p	AMZ1	+	-	-	+
hsa-miR-363-5p	ANAPC15	+	-	-	-
hsa-miR-363-5p	ANGPT2	-	-	-	+
hsa-miR-363-5p	ANKFN1	+	-	-	-
hsa-miR-363-5p	ANKFY1	-	-	-	+
hsa-miR-363-5p	ANKLE1	+	-	-	+
hsa-miR-363-5p	ANKRD13B	-	-	-	+
hsa-miR-363-5p	ANKRD40	-	-	-	+
hsa-miR-363-5p	ANKRD42	-	-	-	+
hsa-miR-363-5p	ANKRD44	-	+	-	-
hsa-miR-363-5p	ANKRD45	-	-	+	-
hsa-miR-363-5p	ANKRD52	-	-	-	+
hsa-miR-363-5p	ANKRD53	-	-	-	+
hsa-miR-363-5p	ANKRD54	-	-	-	+
hsa-miR-363-5p	ANKS3	-	+	-	-
hsa-miR-363-5p	ANP32B	-	-	+	+
hsa-miR-363-5p	ANTXR1	-	+	-	+
hsa-miR-363-5p	AP001579.1	+	-	-	-
hsa-miR-363-5p	AP1B1	-	-	-	+
hsa-miR-363-5p	AP1G1	-	-	-	+
hsa-miR-363-5p	AP1M1	+	-	-	-
hsa-miR-363-5p	AP1S1	-	+	-	+
hsa-miR-363-5p	AP2M1	-	-	-	+
hsa-miR-363-5p	APC2	-	-	-	+
hsa-miR-363-5p	APH1A	-	-	-	+
hsa-miR-363-5p	APOA2	+	-	-	-
hsa-miR-363-5p	APOBEC3F	+	-	+	-
hsa-miR-363-5p	APOBR	+	-	-	-
hsa-miR-363-5p	APOC4	+	-	-	-
hsa-miR-363-5p	APOL6	-	-	-	+
hsa-miR-363-5p	APOOL	-	+	-	-
hsa-miR-363-5p	APPL2	-	+	-	-
hsa-miR-363-5p	AQP2	-	-	-	+
hsa-miR-363-5p	AQP3	-	+	-	+
hsa-miR-363-5p	AQP4	+	+	-	+
hsa-miR-363-5p	AQP9	+	-	-	+
hsa-miR-363-5p	AR	+	-	-	+
hsa-miR-363-5p	ARC	+	-	-	+
hsa-miR-363-5p	ARF3	-	+	-	+
hsa-miR-363-5p	ARFGAP2	-	-	-	+
hsa-miR-363-5p	ARHGAP1	-	-	-	+
hsa-miR-363-5p	ARHGAP17	-	+	-	-
hsa-miR-363-5p	ARHGDIA	+	-	-	-
hsa-miR-363-5p	ARHGEF1	-	-	-	+
hsa-miR-363-5p	ARHGEF12	-	-	-	+
hsa-miR-363-5p	ARL10	+	-	-	-
hsa-miR-363-5p	ARL2	-	-	-	+
hsa-miR-363-5p	ARL6IP5	+	-	-	+
hsa-miR-363-5p	ARL8B	+	-	-	-
hsa-miR-363-5p	ARMC7	+	-	-	+
hsa-miR-363-5p	ARMC8	-	-	-	+
hsa-miR-363-5p	ARMCX6	-	+	+	+
hsa-miR-363-5p	ARNT2	-	-	-	+
hsa-miR-363-5p	ARRB1	-	+	-	-
hsa-miR-363-5p	ARRDC2	-	-	-	+
hsa-miR-363-5p	ARRDC5	-	-	-	+
hsa-miR-363-5p	ARSB	-	-	-	+
hsa-miR-363-5p	ASAP2	-	-	-	+
hsa-miR-363-5p	ASB6	-	+	-	-
hsa-miR-363-5p	ASCC1	-	-	-	+
hsa-miR-363-5p	ASXL2	-	-	-	+
hsa-miR-363-5p	ATAD3C	-	-	-	+
hsa-miR-363-5p	ATCAY	+	+	-	+
hsa-miR-363-5p	ATE1	-	-	-	+
hsa-miR-363-5p	ATF2	-	+	-	-
hsa-miR-363-5p	ATF6	-	+	-	+
hsa-miR-363-5p	ATF7	-	-	-	+
hsa-miR-363-5p	ATG14	-	-	-	+
hsa-miR-363-5p	ATHL1	-	-	-	+
hsa-miR-363-5p	ATN1	+	-	-	-
hsa-miR-363-5p	ATOX1	+	-	-	-
hsa-miR-363-5p	ATP1A1	-	-	-	+
hsa-miR-363-5p	ATP1B2	-	+	-	+
hsa-miR-363-5p	ATP2A3	-	-	-	+
hsa-miR-363-5p	ATP2B1	-	-	-	+
hsa-miR-363-5p	ATP2B2	-	+	-	-
hsa-miR-363-5p	ATP2B4	-	-	-	+
hsa-miR-363-5p	ATP5D	+	-	-	-
hsa-miR-363-5p	ATP6V0A1	-	-	-	+
hsa-miR-363-5p	ATP6V0D2	-	-	-	+
hsa-miR-363-5p	ATXN1L	-	-	-	+
hsa-miR-363-5p	ATXN2L	+	-	-	-
hsa-miR-363-5p	ATXN7L1	+	-	-	+
hsa-miR-363-5p	ATXN7L3	-	+	-	-
hsa-miR-363-5p	AURKC	-	-	-	+
hsa-miR-363-5p	BAAT	+	-	-	+
hsa-miR-363-5p	BACH2	-	+	-	+
hsa-miR-363-5p	BAD	+	-	-	+
hsa-miR-363-5p	BAHD1	-	-	-	+
hsa-miR-363-5p	BAIAP3	-	-	-	+
hsa-miR-363-5p	BAK1	+	-	-	-
hsa-miR-363-5p	BARHL1	-	-	-	+
hsa-miR-363-5p	BARX1	-	-	-	+
hsa-miR-363-5p	BATF3	-	-	-	+
hsa-miR-363-5p	BBS5	-	-	-	+
hsa-miR-363-5p	BBS7	-	-	-	+
hsa-miR-363-5p	BBX	-	+	-	+
hsa-miR-363-5p	BCAS4	+	-	-	-
hsa-miR-363-5p	BCKDHA	+	-	-	-
hsa-miR-363-5p	BCL2L14	-	-	-	+
hsa-miR-363-5p	BCL3	+	-	-	+
hsa-miR-363-5p	BCL7A	-	-	+	-
hsa-miR-363-5p	BCORL1	-	-	-	+
hsa-miR-363-5p	BDKRB2	+	-	-	-
hsa-miR-363-5p	BEAN1	+	-	-	-
hsa-miR-363-5p	BEND6	+	+	-	-
hsa-miR-363-5p	BHLHE40	-	-	-	+
hsa-miR-363-5p	BHLHE41	-	-	-	+
hsa-miR-363-5p	BHMT	-	-	-	+
hsa-miR-363-5p	BIRC6	-	-	-	+
hsa-miR-363-5p	BLOC1S3	+	+	-	+
hsa-miR-363-5p	BMP2	-	-	-	+
hsa-miR-363-5p	BMP7	-	-	-	+
hsa-miR-363-5p	BMPR1A	+	-	-	-
hsa-miR-363-5p	BNIP3L	-	-	-	+
hsa-miR-363-5p	BOK	-	-	-	+
hsa-miR-363-5p	BPI	+	-	-	-
hsa-miR-363-5p	BRI3BP	+	+	-	-
hsa-miR-363-5p	BRMS1	-	-	-	+
hsa-miR-363-5p	BRPF3	+	-	-	-
hsa-miR-363-5p	BSG	-	-	-	+
hsa-miR-363-5p	BSN	-	-	-	+
hsa-miR-363-5p	BTBD2	+	-	-	+
hsa-miR-363-5p	BTBD9	-	-	-	+
hsa-miR-363-5p	BTD	-	-	-	+
hsa-miR-363-5p	BTN1A1	-	-	-	+
hsa-miR-363-5p	BTN2A1	+	-	-	-
hsa-miR-363-5p	BTN2A2	+	-	-	-
hsa-miR-363-5p	BTN3A1	-	+	-	+
hsa-miR-363-5p	BZRAP1	+	+	-	+
hsa-miR-363-5p	C10orf108	-	-	-	+
hsa-miR-363-5p	C10orf54	-	-	-	+
hsa-miR-363-5p	C10orf76	+	-	+	+
hsa-miR-363-5p	C10orf90	+	-	-	-
hsa-miR-363-5p	C11orf16	-	-	-	+
hsa-miR-363-5p	C11orf58	-	-	+	-
hsa-miR-363-5p	C11orf83	-	-	-	+
hsa-miR-363-5p	C11orf86	-	-	-	+
hsa-miR-363-5p	C11orf87	+	+	-	+
hsa-miR-363-5p	C11orf9	-	-	-	+
hsa-miR-363-5p	C12orf49	+	+	-	-
hsa-miR-363-5p	C12orf61	-	-	-	+
hsa-miR-363-5p	C12orf75	-	+	-	-
hsa-miR-363-5p	C13orf35	+	-	-	-
hsa-miR-363-5p	C14orf105	-	-	-	+
hsa-miR-363-5p	C14orf144	+	-	-	-
hsa-miR-363-5p	C15orf37	+	-	-	-
hsa-miR-363-5p	C15orf53	+	+	-	+
hsa-miR-363-5p	C15orf55	-	-	-	+
hsa-miR-363-5p	C16orf45	-	-	-	+
hsa-miR-363-5p	C16orf54	+	-	-	+
hsa-miR-363-5p	C16orf70	-	-	-	+
hsa-miR-363-5p	C16orf78	-	-	-	+
hsa-miR-363-5p	C16orf89	+	-	-	-
hsa-miR-363-5p	C17orf101	-	-	-	+
hsa-miR-363-5p	C17orf103	+	-	-	-
hsa-miR-363-5p	C17orf107	-	-	-	+
hsa-miR-363-5p	C17orf72	-	-	-	+
hsa-miR-363-5p	C17orf96	+	-	-	-
hsa-miR-363-5p	C17orf97	-	-	-	+
hsa-miR-363-5p	C18orf54	-	-	-	+
hsa-miR-363-5p	C19orf25	+	-	-	-
hsa-miR-363-5p	C19orf44	-	-	-	+
hsa-miR-363-5p	C19orf54	-	-	-	+
hsa-miR-363-5p	C19orf55	+	-	-	-
hsa-miR-363-5p	C19orf57	+	-	-	-
hsa-miR-363-5p	C19orf81	-	-	-	+
hsa-miR-363-5p	C1orf100	-	-	-	+
hsa-miR-363-5p	C1orf106	-	-	-	+
hsa-miR-363-5p	C1orf116	-	-	-	+
hsa-miR-363-5p	C1orf198	+	-	-	+
hsa-miR-363-5p	C1orf200	+	-	-	+
hsa-miR-363-5p	C1orf213	-	-	-	+
hsa-miR-363-5p	C1orf226	+	-	-	-
hsa-miR-363-5p	C1orf229	+	-	-	-
hsa-miR-363-5p	C1orf233	-	-	-	+
hsa-miR-363-5p	C1orf56	-	+	-	+
hsa-miR-363-5p	C1orf95	-	-	-	+
hsa-miR-363-5p	C1QL1	+	-	-	+
hsa-miR-363-5p	C1QL2	+	-	-	+
hsa-miR-363-5p	C1QL4	-	-	-	+
hsa-miR-363-5p	C1QTNF8	+	-	-	-
hsa-miR-363-5p	C1RL	-	-	-	+
hsa-miR-363-5p	C20orf118	-	-	-	+
hsa-miR-363-5p	C20orf151	-	-	-	+
hsa-miR-363-5p	C20orf160	-	-	-	+
hsa-miR-363-5p	C20orf196	+	-	-	-
hsa-miR-363-5p	C20orf24	+	-	-	-
hsa-miR-363-5p	C21orf58	-	-	-	+
hsa-miR-363-5p	C22orf32	-	-	-	+
hsa-miR-363-5p	C2CD2L	-	-	-	+
hsa-miR-363-5p	C2CD4D	+	-	-	-
hsa-miR-363-5p	C2orf42	-	-	-	+
hsa-miR-363-5p	C2orf54	-	-	-	+
hsa-miR-363-5p	C2orf68	+	+	-	-
hsa-miR-363-5p	C2orf71	-	-	-	+
hsa-miR-363-5p	C3orf17	-	-	-	+
hsa-miR-363-5p	C3orf18	+	-	-	+
hsa-miR-363-5p	C3orf45	-	-	-	+
hsa-miR-363-5p	C3orf52	+	-	-	-
hsa-miR-363-5p	C3orf65	+	-	-	-
hsa-miR-363-5p	C3orf67	+	-	-	-
hsa-miR-363-5p	C3orf70	-	-	-	+
hsa-miR-363-5p	C4orf50	+	-	-	-
hsa-miR-363-5p	C5	-	-	-	+
hsa-miR-363-5p	C5AR1	-	-	-	+
hsa-miR-363-5p	C5orf20	-	-	-	+
hsa-miR-363-5p	C5orf38	-	-	-	+
hsa-miR-363-5p	C5orf51	-	-	-	+
hsa-miR-363-5p	C5orf52	-	-	-	+
hsa-miR-363-5p	C6orf123	-	-	-	+
hsa-miR-363-5p	C6orf195	+	-	-	-
hsa-miR-363-5p	C6orf223	-	-	-	+
hsa-miR-363-5p	C6ORF50	+	-	-	-
hsa-miR-363-5p	C7orf65	+	-	-	-
hsa-miR-363-5p	C8orf73	-	-	-	+
hsa-miR-363-5p	C9orf114	-	-	+	+
hsa-miR-363-5p	C9orf116	-	+	-	+
hsa-miR-363-5p	C9orf16	-	-	-	+
hsa-miR-363-5p	C9orf163	+	-	-	-
hsa-miR-363-5p	CA7	-	-	-	+
hsa-miR-363-5p	CABIN1	-	-	-	+
hsa-miR-363-5p	CABLES1	-	-	-	+
hsa-miR-363-5p	CABLES2	-	-	-	+
hsa-miR-363-5p	CABP7	-	-	-	+
hsa-miR-363-5p	CACNA1E	+	+	-	-
hsa-miR-363-5p	CACNA1I	-	-	-	+
hsa-miR-363-5p	CACNA2D2	-	-	-	+
hsa-miR-363-5p	CACNG4	-	-	-	+
hsa-miR-363-5p	CACNG5	+	-	-	-
hsa-miR-363-5p	CACNG7	-	-	-	+
hsa-miR-363-5p	CADM3	-	-	-	+
hsa-miR-363-5p	CADM4	+	-	-	+
hsa-miR-363-5p	CALB2	+	-	-	+
hsa-miR-363-5p	CALCR	+	+	-	+
hsa-miR-363-5p	CALM3	-	-	-	+
hsa-miR-363-5p	CALN1	-	+	-	+
hsa-miR-363-5p	CAMK2A	-	-	-	+
hsa-miR-363-5p	CAMK2N2	+	-	-	+
hsa-miR-363-5p	CAMKK1	-	-	-	+
hsa-miR-363-5p	CAMKV	-	-	-	+
hsa-miR-363-5p	CAMSAP3	-	-	-	+
hsa-miR-363-5p	CAND2	+	-	-	+
hsa-miR-363-5p	CANT1	+	-	-	+
hsa-miR-363-5p	CAPN1	+	-	-	+
hsa-miR-363-5p	CAPN5	-	-	-	+
hsa-miR-363-5p	CAPN6	-	+	-	+
hsa-miR-363-5p	CAPS	+	-	-	-
hsa-miR-363-5p	CARD8	-	-	+	-
hsa-miR-363-5p	CASKIN1	-	-	-	+
hsa-miR-363-5p	CASKIN2	-	-	-	+
hsa-miR-363-5p	CASP2	-	-	-	+
hsa-miR-363-5p	CASP8	+	-	-	-
hsa-miR-363-5p	CASR	-	-	-	+
hsa-miR-363-5p	CAST	-	-	-	+
hsa-miR-363-5p	CASZ1	-	-	-	+
hsa-miR-363-5p	CATSPER2	+	-	-	-
hsa-miR-363-5p	CBLN3	-	+	-	+
hsa-miR-363-5p	CBR1	+	-	-	-
hsa-miR-363-5p	CBX5	-	+	-	+
hsa-miR-363-5p	CBX6	-	-	+	+
hsa-miR-363-5p	CBX7	-	-	-	+
hsa-miR-363-5p	CC2D1B	+	-	-	+
hsa-miR-363-5p	CCDC113	-	+	-	+
hsa-miR-363-5p	CCDC137	-	-	-	+
hsa-miR-363-5p	CCDC141	+	-	-	-
hsa-miR-363-5p	CCDC150	+	+	-	-
hsa-miR-363-5p	CCDC169-SOHLH2	+	-	-	-
hsa-miR-363-5p	CCDC177	+	+	-	-
hsa-miR-363-5p	CCDC191	-	+	-	-
hsa-miR-363-5p	CCDC40	+	-	-	+
hsa-miR-363-5p	CCDC6	-	-	+	-
hsa-miR-363-5p	CCDC64	-	-	+	-
hsa-miR-363-5p	CCDC85C	-	+	-	-
hsa-miR-363-5p	CCL14	+	-	-	-
hsa-miR-363-5p	CCL21	-	-	-	+
hsa-miR-363-5p	CCL28	-	-	-	+
hsa-miR-363-5p	CCND1	-	-	-	+
hsa-miR-363-5p	CCNJL	-	-	-	+
hsa-miR-363-5p	CCPG1	-	+	-	+
hsa-miR-363-5p	CD109	-	-	-	+
hsa-miR-363-5p	CD151	-	-	-	+
hsa-miR-363-5p	CD1B	-	-	-	+
hsa-miR-363-5p	CD207	+	-	-	-
hsa-miR-363-5p	CD209	+	-	-	-
hsa-miR-363-5p	CD22	-	-	-	+
hsa-miR-363-5p	CD226	-	-	+	-
hsa-miR-363-5p	CD27	-	-	-	+
hsa-miR-363-5p	CD274	-	-	+	-
hsa-miR-363-5p	CD302	-	-	-	+
hsa-miR-363-5p	CD37	+	-	-	-
hsa-miR-363-5p	CD4	-	-	-	+
hsa-miR-363-5p	CD40LG	-	+	-	-
hsa-miR-363-5p	CD44	-	-	-	+
hsa-miR-363-5p	CD5	+	-	-	+
hsa-miR-363-5p	CD74	+	+	-	-
hsa-miR-363-5p	CD81	+	-	-	-
hsa-miR-363-5p	CD86	-	-	-	+
hsa-miR-363-5p	CD99L2	-	-	-	+
hsa-miR-363-5p	CDC42	-	-	-	+
hsa-miR-363-5p	CDC42BPB	+	-	-	+
hsa-miR-363-5p	CDC42EP4	-	-	-	+
hsa-miR-363-5p	CDC42SE1	+	-	-	-
hsa-miR-363-5p	CDCP1	-	+	-	+
hsa-miR-363-5p	CDH18	-	-	-	+
hsa-miR-363-5p	CDH24	-	-	-	+
hsa-miR-363-5p	CDH6	-	+	-	+
hsa-miR-363-5p	CDIPT	+	-	-	+
hsa-miR-363-5p	CDK12	-	-	-	+
hsa-miR-363-5p	CDK16	-	-	-	+
hsa-miR-363-5p	CDK2AP2	+	-	-	-
hsa-miR-363-5p	CDK5R1	-	-	-	+
hsa-miR-363-5p	CDK9	+	-	-	+
hsa-miR-363-5p	CDKAL1	+	-	-	-
hsa-miR-363-5p	CDKL4	+	-	-	-
hsa-miR-363-5p	CDKN1A	-	-	-	+
hsa-miR-363-5p	CDKN2B	+	-	-	-
hsa-miR-363-5p	CDR2L	-	-	-	+
hsa-miR-363-5p	CDSN	+	-	-	-
hsa-miR-363-5p	CDX1	-	-	-	+
hsa-miR-363-5p	CEACAM16	-	-	-	+
hsa-miR-363-5p	CEACAM19	-	-	-	+
hsa-miR-363-5p	CEACAM8	+	+	-	+
hsa-miR-363-5p	CECR2	-	-	+	-
hsa-miR-363-5p	CECR6	+	-	-	+
hsa-miR-363-5p	CELF1	+	-	-	+
hsa-miR-363-5p	CELF5	-	-	-	+
hsa-miR-363-5p	CELSR2	-	-	-	+
hsa-miR-363-5p	CEND1	-	-	-	+
hsa-miR-363-5p	CENPB	-	-	-	+
hsa-miR-363-5p	CENPO	-	-	-	+
hsa-miR-363-5p	CENPP	+	-	-	-
hsa-miR-363-5p	CEP104	-	-	-	+
hsa-miR-363-5p	CEP164	-	-	-	+
hsa-miR-363-5p	CEP19	+	-	-	+
hsa-miR-363-5p	CEP85	-	-	-	+
hsa-miR-363-5p	CEP85L	-	-	-	+
hsa-miR-363-5p	CEP97	-	-	+	+
hsa-miR-363-5p	CES3	-	-	-	+
hsa-miR-363-5p	CGGBP1	-	-	-	+
hsa-miR-363-5p	CGNL1	+	-	-	+
hsa-miR-363-5p	CHAC1	-	-	+	-
hsa-miR-363-5p	CHAD	-	+	-	-
hsa-miR-363-5p	CHAMP1	+	-	-	-
hsa-miR-363-5p	CHCHD3	-	-	-	+
hsa-miR-363-5p	CHID1	-	-	-	+
hsa-miR-363-5p	CHMP1A	+	-	-	+
hsa-miR-363-5p	CHMP3	-	-	-	+
hsa-miR-363-5p	CHP1	-	+	-	+
hsa-miR-363-5p	CHPF	+	-	-	+
hsa-miR-363-5p	CHRM1	+	-	-	+
hsa-miR-363-5p	CHRNA6	+	-	-	-
hsa-miR-363-5p	CHRNB2	-	-	-	+
hsa-miR-363-5p	CHRNE	+	-	-	-
hsa-miR-363-5p	CHST14	+	-	-	-
hsa-miR-363-5p	CHTF8	-	-	-	+
hsa-miR-363-5p	CIAPIN1	+	+	-	+
hsa-miR-363-5p	CIDEB	+	-	-	-
hsa-miR-363-5p	CISH	-	-	-	+
hsa-miR-363-5p	CKM	-	-	-	+
hsa-miR-363-5p	CKMT1B	+	-	-	-
hsa-miR-363-5p	CLASP1	-	-	-	+
hsa-miR-363-5p	CLCF1	+	-	-	+
hsa-miR-363-5p	CLCN2	+	-	-	-
hsa-miR-363-5p	CLCN5	-	-	-	+
hsa-miR-363-5p	CLDN22	+	+	-	+
hsa-miR-363-5p	CLDN23	-	+	-	+
hsa-miR-363-5p	CLDN4	-	-	-	+
hsa-miR-363-5p	CLEC12B	+	-	-	-
hsa-miR-363-5p	CLEC18A	+	-	-	-
hsa-miR-363-5p	CLEC4D	+	+	-	+
hsa-miR-363-5p	CLEC4E	-	-	-	+
hsa-miR-363-5p	CLEC4M	-	+	-	-
hsa-miR-363-5p	CLEC9A	-	-	-	+
hsa-miR-363-5p	CLIP2	-	-	-	+
hsa-miR-363-5p	CLIP3	-	-	-	+
hsa-miR-363-5p	CLK2	-	-	-	+
hsa-miR-363-5p	CLK3	+	-	-	-
hsa-miR-363-5p	CLMN	-	-	-	+
hsa-miR-363-5p	CLPB	-	-	-	+
hsa-miR-363-5p	CLSTN1	-	-	-	+
hsa-miR-363-5p	CLTCL1	+	-	-	-
hsa-miR-363-5p	CLVS1	+	-	-	-
hsa-miR-363-5p	CMIP	-	-	-	+
hsa-miR-363-5p	CMTM4	-	+	-	-
hsa-miR-363-5p	CMTR1	+	+	-	+
hsa-miR-363-5p	CNDP1	+	-	-	-
hsa-miR-363-5p	CNGB1	-	-	-	+
hsa-miR-363-5p	CNN1	-	-	-	+
hsa-miR-363-5p	CNNM1	-	-	-	+
hsa-miR-363-5p	CNNM4	-	+	+	+
hsa-miR-363-5p	CNPY4	+	-	-	+
hsa-miR-363-5p	CNR2	+	-	-	-
hsa-miR-363-5p	CNTFR	+	-	-	+
hsa-miR-363-5p	CNTNAP2	-	-	-	+
hsa-miR-363-5p	COG6	-	-	-	+
hsa-miR-363-5p	COL15A1	-	-	-	+
hsa-miR-363-5p	COL1A1	+	+	-	+
hsa-miR-363-5p	COL20A1	-	-	-	+
hsa-miR-363-5p	COL23A1	+	-	-	+
hsa-miR-363-5p	COL25A1	+	-	-	-
hsa-miR-363-5p	COL28A1	+	-	-	-
hsa-miR-363-5p	COL4A3BP	-	-	+	-
hsa-miR-363-5p	COL4A4	+	-	-	+
hsa-miR-363-5p	COL4A6	-	-	-	+
hsa-miR-363-5p	COL5A3	-	-	-	+
hsa-miR-363-5p	COL8A2	-	-	-	+
hsa-miR-363-5p	COL9A2	+	+	-	+
hsa-miR-363-5p	COLGALT1	+	-	-	-
hsa-miR-363-5p	COPA	-	-	-	+
hsa-miR-363-5p	COPZ1	+	-	-	-
hsa-miR-363-5p	COQ7	+	-	-	+
hsa-miR-363-5p	CORO2B	-	-	-	+
hsa-miR-363-5p	COX10	-	-	-	+
hsa-miR-363-5p	COX6B2	+	-	-	-
hsa-miR-363-5p	COX7B	+	-	-	-
hsa-miR-363-5p	CPLX1	+	-	-	+
hsa-miR-363-5p	CPLX2	-	-	-	+
hsa-miR-363-5p	CPOX	-	-	-	+
hsa-miR-363-5p	CPS1	+	+	-	+
hsa-miR-363-5p	CPSF7	-	-	-	+
hsa-miR-363-5p	CPXM2	-	-	-	+
hsa-miR-363-5p	CRB3	+	-	-	+
hsa-miR-363-5p	CREB5	-	-	-	+
hsa-miR-363-5p	CREBBP	-	-	-	+
hsa-miR-363-5p	CREBL2	-	-	-	+
hsa-miR-363-5p	CRIP2	+	-	-	-
hsa-miR-363-5p	CRISPLD2	-	-	-	+
hsa-miR-363-5p	CRK	-	+	-	+
hsa-miR-363-5p	CRKL	-	-	-	+
hsa-miR-363-5p	CRLF3	-	-	-	+
hsa-miR-363-5p	CRP	+	-	-	-
hsa-miR-363-5p	CRTC1	+	-	-	-
hsa-miR-363-5p	CRTC3	+	-	-	+
hsa-miR-363-5p	CRX	-	-	-	+
hsa-miR-363-5p	CRY2	-	+	-	+
hsa-miR-363-5p	CSDC2	-	-	-	+
hsa-miR-363-5p	CSF1	-	-	-	+
hsa-miR-363-5p	CSF3R	+	-	-	-
hsa-miR-363-5p	CSK	-	-	-	+
hsa-miR-363-5p	CSMD3	-	-	-	+
hsa-miR-363-5p	CSNK1E	+	-	+	-
hsa-miR-363-5p	CSNK1G1	+	-	-	-
hsa-miR-363-5p	CSNK2B	-	-	-	+
hsa-miR-363-5p	CSPG4	-	-	-	+
hsa-miR-363-5p	CSRP1	+	-	-	-
hsa-miR-363-5p	CTB-134H23.1	-	-	-	+
hsa-miR-363-5p	CTB-58E17.5	+	-	-	-
hsa-miR-363-5p	CTC-435M10.3	+	-	-	-
hsa-miR-363-5p	CTCFL	+	+	-	-
hsa-miR-363-5p	CTD-2210P24.4	-	-	-	+
hsa-miR-363-5p	CTD-2267D19.3	+	-	-	-
hsa-miR-363-5p	CTD-2616J11.4	-	-	-	+
hsa-miR-363-5p	CTDSP2	-	-	-	+
hsa-miR-363-5p	CTGF	+	-	-	-
hsa-miR-363-5p	CTNNBIP1	-	-	-	+
hsa-miR-363-5p	CTSD	+	-	-	-
hsa-miR-363-5p	CTSK	+	-	-	+
hsa-miR-363-5p	CTTNBP2NL	-	-	-	+
hsa-miR-363-5p	CTU1	+	-	-	-
hsa-miR-363-5p	CUBN	-	-	-	+
hsa-miR-363-5p	CUX2	-	-	-	+
hsa-miR-363-5p	CX3CL1	+	-	-	+
hsa-miR-363-5p	CX3CR1	+	-	-	-
hsa-miR-363-5p	CXCL9	-	-	-	+
hsa-miR-363-5p	CXorf23	-	-	-	+
hsa-miR-363-5p	CXorf40A	+	-	-	-
hsa-miR-363-5p	CXorf69	-	-	-	+
hsa-miR-363-5p	CXXC4	+	-	-	-
hsa-miR-363-5p	CYB561D1	+	-	-	-
hsa-miR-363-5p	CYB5R3	-	-	-	+
hsa-miR-363-5p	CYCS	+	-	-	-
hsa-miR-363-5p	CYLC2	-	-	-	+
hsa-miR-363-5p	CYP17A1	-	-	-	+
hsa-miR-363-5p	CYP2B6	+	-	+	+
hsa-miR-363-5p	CYP4A11	+	-	+	-
hsa-miR-363-5p	CYP4A22	+	-	+	-
hsa-miR-363-5p	CYP4F22	-	+	-	+
hsa-miR-363-5p	CYP8B1	-	-	-	+
hsa-miR-363-5p	DAB1	+	-	-	-
hsa-miR-363-5p	DAK	-	-	-	+
hsa-miR-363-5p	DAND5	+	-	-	-
hsa-miR-363-5p	DAZAP2	+	-	-	-
hsa-miR-363-5p	DBN1	+	+	-	+
hsa-miR-363-5p	DBNDD1	-	-	-	+
hsa-miR-363-5p	DCAF12	-	-	-	+
hsa-miR-363-5p	DCAF7	+	-	-	-
hsa-miR-363-5p	DCC	+	-	-	-
hsa-miR-363-5p	DCHS1	-	-	-	+
hsa-miR-363-5p	DCHS2	-	-	-	+
hsa-miR-363-5p	DCLK2	-	-	-	+
hsa-miR-363-5p	DCTD	+	-	-	-
hsa-miR-363-5p	DCX	-	-	-	+
hsa-miR-363-5p	DDA1	-	+	-	+
hsa-miR-363-5p	DDN	-	-	-	+
hsa-miR-363-5p	DDR1	-	-	-	+
hsa-miR-363-5p	DDX51	-	-	-	+
hsa-miR-363-5p	DDX54	-	-	-	+
hsa-miR-363-5p	DEDD	-	-	-	+
hsa-miR-363-5p	DEF8	-	-	-	+
hsa-miR-363-5p	DENND1C	+	-	-	-
hsa-miR-363-5p	DENND4B	-	-	-	+
hsa-miR-363-5p	DESI1	-	-	-	+
hsa-miR-363-5p	DGCR8	+	+	-	+
hsa-miR-363-5p	DGKG	-	-	-	+
hsa-miR-363-5p	DHCR24	-	-	-	+
hsa-miR-363-5p	DHDDS	+	-	-	-
hsa-miR-363-5p	DHH	-	-	-	+
hsa-miR-363-5p	DHX33	-	-	-	+
hsa-miR-363-5p	DIO2	+	-	-	+
hsa-miR-363-5p	DIRAS1	-	-	-	+
hsa-miR-363-5p	DIRAS2	-	-	-	+
hsa-miR-363-5p	DKK2	-	+	-	+
hsa-miR-363-5p	DLC1	+	-	-	+
hsa-miR-363-5p	DLGAP2	-	-	-	+
hsa-miR-363-5p	DLX1	-	-	-	+
hsa-miR-363-5p	DLX3	-	-	-	+
hsa-miR-363-5p	DLX4	+	-	-	-
hsa-miR-363-5p	DLX6	-	-	-	+
hsa-miR-363-5p	DMBX1	-	-	-	+
hsa-miR-363-5p	DNAH17-AS1	+	-	-	-
hsa-miR-363-5p	DNAH3	+	-	-	-
hsa-miR-363-5p	DNAJB12	-	-	-	+
hsa-miR-363-5p	DNAJB13	-	-	-	+
hsa-miR-363-5p	DNAJC14	-	-	-	+
hsa-miR-363-5p	DNAJC6	-	-	-	+
hsa-miR-363-5p	DNAJC8	+	+	-	+
hsa-miR-363-5p	DNASE1L1	-	-	-	+
hsa-miR-363-5p	DNLZ	-	-	+	-
hsa-miR-363-5p	DOC2A	-	-	-	+
hsa-miR-363-5p	DOCK3	-	-	-	+
hsa-miR-363-5p	DOT1L	-	-	-	+
hsa-miR-363-5p	DPCR1	-	-	-	+
hsa-miR-363-5p	DPF1	+	-	-	-
hsa-miR-363-5p	DPF2	-	-	-	+
hsa-miR-363-5p	DPF3	+	-	-	-
hsa-miR-363-5p	DPH5	+	-	-	-
hsa-miR-363-5p	DPYSL5	-	-	-	+
hsa-miR-363-5p	DRAXIN	+	-	-	-
hsa-miR-363-5p	DRP2	-	+	-	-
hsa-miR-363-5p	DSCAM	-	-	-	+
hsa-miR-363-5p	DSCAML1	-	-	-	+
hsa-miR-363-5p	DSCC1	+	+	-	+
hsa-miR-363-5p	DSCR3	-	-	-	+
hsa-miR-363-5p	DSCR6	-	-	-	+
hsa-miR-363-5p	DSN1	-	-	+	-
hsa-miR-363-5p	DTNA	+	-	-	+
hsa-miR-363-5p	DTX1	+	-	-	-
hsa-miR-363-5p	DUOX2	+	-	-	-
hsa-miR-363-5p	DUSP22	-	-	-	+
hsa-miR-363-5p	DUSP28	+	-	-	-
hsa-miR-363-5p	DUSP3	-	+	-	+
hsa-miR-363-5p	DVL3	-	-	-	+
hsa-miR-363-5p	DYNLT3	+	-	-	-
hsa-miR-363-5p	DZIP1	-	+	-	-
hsa-miR-363-5p	E2F2	-	-	-	+
hsa-miR-363-5p	E2F4	-	-	-	+
hsa-miR-363-5p	E4F1	+	-	-	-
hsa-miR-363-5p	EBF1	-	+	-	+
hsa-miR-363-5p	EBF3	+	-	-	-
hsa-miR-363-5p	EBI3	-	-	-	+
hsa-miR-363-5p	EBLN2	-	-	-	+
hsa-miR-363-5p	ECE1	-	-	-	+
hsa-miR-363-5p	ECM1	-	-	-	+
hsa-miR-363-5p	ECSIT	-	-	+	-
hsa-miR-363-5p	EDA	-	+	-	+
hsa-miR-363-5p	EDN3	+	-	-	+
hsa-miR-363-5p	EEF2K	+	-	-	-
hsa-miR-363-5p	EEFSEC	+	-	-	-
hsa-miR-363-5p	EFCAB14	+	-	-	-
hsa-miR-363-5p	EFCAB5	+	-	-	-
hsa-miR-363-5p	EFHD2	-	-	-	+
hsa-miR-363-5p	EFNA5	-	-	-	+
hsa-miR-363-5p	EFNB1	-	-	-	+
hsa-miR-363-5p	EFNB3	-	-	-	+
hsa-miR-363-5p	EFS	+	-	-	-
hsa-miR-363-5p	EGFL7	-	-	-	+
hsa-miR-363-5p	EHBP1	-	-	-	+
hsa-miR-363-5p	EHD2	+	-	-	+
hsa-miR-363-5p	EHD4	+	-	-	-
hsa-miR-363-5p	EHMT2	-	-	-	+
hsa-miR-363-5p	EIF1AD	-	+	-	+
hsa-miR-363-5p	EIF2AK2	+	-	-	-
hsa-miR-363-5p	EIF4B	-	+	-	+
hsa-miR-363-5p	EIF4E1B	+	+	-	+
hsa-miR-363-5p	EIF4E2	-	+	-	+
hsa-miR-363-5p	EIF4EBP1	-	-	-	+
hsa-miR-363-5p	EIF5	-	-	-	+
hsa-miR-363-5p	EIF5AL1	-	-	-	+
hsa-miR-363-5p	ELAVL3	-	-	-	+
hsa-miR-363-5p	ELFN1	+	-	-	+
hsa-miR-363-5p	ELK4	-	-	-	+
hsa-miR-363-5p	ELMO1	+	+	-	-
hsa-miR-363-5p	ELMSAN1	-	-	-	+
hsa-miR-363-5p	ELN	-	-	-	+
hsa-miR-363-5p	ELOVL1	-	-	-	+
hsa-miR-363-5p	ENTHD1	-	-	-	+
hsa-miR-363-5p	ENTPD1	-	-	-	+
hsa-miR-363-5p	ENTPD2	+	+	-	+
hsa-miR-363-5p	ENTPD3	-	-	-	+
hsa-miR-363-5p	ENTPD5	-	-	-	+
hsa-miR-363-5p	EPB41L1	-	-	-	+
hsa-miR-363-5p	EPHA8	-	-	-	+
hsa-miR-363-5p	EPN1	+	-	-	+
hsa-miR-363-5p	EPS15L1	+	-	-	-
hsa-miR-363-5p	EPS8L2	+	-	-	-
hsa-miR-363-5p	ERAP1	-	+	-	-
hsa-miR-363-5p	ERBB4	-	-	-	+
hsa-miR-363-5p	ERC1	+	-	-	-
hsa-miR-363-5p	ERF	-	-	-	+
hsa-miR-363-5p	ERGIC1	+	+	-	-
hsa-miR-363-5p	ERVFRD-1	-	-	-	+
hsa-miR-363-5p	ESAM	+	-	-	-
hsa-miR-363-5p	ESCO2	+	-	-	-
hsa-miR-363-5p	ETNK2	-	-	-	+
hsa-miR-363-5p	ETV5	-	-	-	+
hsa-miR-363-5p	EVI5	-	-	+	+
hsa-miR-363-5p	EVPL	+	-	-	-
hsa-miR-363-5p	EXD2	-	+	-	-
hsa-miR-363-5p	EXOSC5	+	-	-	-
hsa-miR-363-5p	EXTL1	+	-	-	+
hsa-miR-363-5p	EXTL3	-	-	-	+
hsa-miR-363-5p	EYA3	-	-	-	+
hsa-miR-363-5p	F2	-	-	-	+
hsa-miR-363-5p	F3	-	-	-	+
hsa-miR-363-5p	F8A2	+	-	-	+
hsa-miR-363-5p	F8A3	+	-	-	-
hsa-miR-363-5p	FA2H	-	-	-	+
hsa-miR-363-5p	FAAH	+	+	-	-
hsa-miR-363-5p	FADS2	-	-	-	+
hsa-miR-363-5p	FAF1	+	-	-	-
hsa-miR-363-5p	FAIM2	-	-	-	+
hsa-miR-363-5p	FAM101B	-	-	-	+
hsa-miR-363-5p	FAM107A	-	-	-	+
hsa-miR-363-5p	FAM109B	-	-	-	+
hsa-miR-363-5p	FAM110B	-	-	-	+
hsa-miR-363-5p	FAM123A	-	-	-	+
hsa-miR-363-5p	FAM123B	-	-	-	+
hsa-miR-363-5p	FAM124A	+	-	-	+
hsa-miR-363-5p	FAM125B	-	-	-	+
hsa-miR-363-5p	FAM126B	+	-	-	-
hsa-miR-363-5p	FAM127A	-	-	-	+
hsa-miR-363-5p	FAM127B	+	-	-	-
hsa-miR-363-5p	FAM129A	-	-	-	+
hsa-miR-363-5p	FAM131A	+	-	-	-
hsa-miR-363-5p	FAM131B	+	-	-	-
hsa-miR-363-5p	FAM134A	-	-	-	+
hsa-miR-363-5p	FAM138A	-	-	-	+
hsa-miR-363-5p	FAM138C	-	-	-	+
hsa-miR-363-5p	FAM155B	-	-	-	+
hsa-miR-363-5p	FAM160B1	-	+	-	+
hsa-miR-363-5p	FAM167A	+	-	-	+
hsa-miR-363-5p	FAM168A	-	+	-	+
hsa-miR-363-5p	FAM169B	+	+	-	+
hsa-miR-363-5p	FAM174B	-	-	-	+
hsa-miR-363-5p	FAM181A	+	-	-	-
hsa-miR-363-5p	FAM182A	-	-	-	+
hsa-miR-363-5p	FAM185A	+	-	-	-
hsa-miR-363-5p	FAM188B	+	-	-	-
hsa-miR-363-5p	FAM189A1	-	-	-	+
hsa-miR-363-5p	FAM196A	+	-	-	+
hsa-miR-363-5p	FAM19A4	+	-	-	-
hsa-miR-363-5p	FAM211A	+	-	-	-
hsa-miR-363-5p	FAM212B	-	-	-	+
hsa-miR-363-5p	FAM215A	-	-	-	+
hsa-miR-363-5p	FAM217B	-	-	-	+
hsa-miR-363-5p	FAM219A	-	-	-	+
hsa-miR-363-5p	FAM222A	-	-	-	+
hsa-miR-363-5p	FAM227A	-	-	-	+
hsa-miR-363-5p	FAM22D	-	-	-	+
hsa-miR-363-5p	FAM27C	-	-	-	+
hsa-miR-363-5p	FAM46A	-	-	-	+
hsa-miR-363-5p	FAM49A	-	-	-	+
hsa-miR-363-5p	FAM71F2	-	-	+	+
hsa-miR-363-5p	FAM75E1	-	-	-	+
hsa-miR-363-5p	FAM78A	-	-	-	+
hsa-miR-363-5p	FAM83E	+	-	-	-
hsa-miR-363-5p	FAM83F	+	-	+	-
hsa-miR-363-5p	FAM84A	-	-	-	+
hsa-miR-363-5p	FAM86C1	+	-	-	-
hsa-miR-363-5p	FAM89A	-	-	-	+
hsa-miR-363-5p	FAM89B	-	-	-	+
hsa-miR-363-5p	FANK1	+	-	-	-
hsa-miR-363-5p	FASN	+	-	-	+
hsa-miR-363-5p	FAT1	-	-	-	+
hsa-miR-363-5p	FAT2	+	-	-	-
hsa-miR-363-5p	FAT4	-	-	-	+
hsa-miR-363-5p	FBXL16	-	-	-	+
hsa-miR-363-5p	FBXL18	+	-	-	-
hsa-miR-363-5p	FBXL19	-	-	-	+
hsa-miR-363-5p	FBXO41	+	-	-	+
hsa-miR-363-5p	FBXO42	-	-	-	+
hsa-miR-363-5p	FBXO44	-	-	-	+
hsa-miR-363-5p	FBXO45	-	-	+	+
hsa-miR-363-5p	FBXO46	+	+	-	+
hsa-miR-363-5p	FBXW2	-	+	-	-
hsa-miR-363-5p	FBXW8	-	-	-	+
hsa-miR-363-5p	FCAMR	+	-	-	-
hsa-miR-363-5p	FCER2	+	-	-	-
hsa-miR-363-5p	FCHSD1	-	+	-	+
hsa-miR-363-5p	FCRLA	-	-	-	+
hsa-miR-363-5p	FFAR3	+	-	-	+
hsa-miR-363-5p	FGD1	+	-	-	+
hsa-miR-363-5p	FGD4	-	+	-	+
hsa-miR-363-5p	FGD5	-	-	-	+
hsa-miR-363-5p	FGF11	+	-	-	-
hsa-miR-363-5p	FGF12	+	-	-	-
hsa-miR-363-5p	FGF17	-	-	-	+
hsa-miR-363-5p	FGR	+	-	-	-
hsa-miR-363-5p	FIBCD1	+	-	-	+
hsa-miR-363-5p	FICD	-	-	-	+
hsa-miR-363-5p	FIZ1	+	-	-	+
hsa-miR-363-5p	FJX1	+	-	-	+
hsa-miR-363-5p	FKBP4	-	+	-	+
hsa-miR-363-5p	FKBP5	-	+	-	+
hsa-miR-363-5p	FKTN	+	-	-	+
hsa-miR-363-5p	FLCN	-	-	-	+
hsa-miR-363-5p	FLNC	+	-	-	+
hsa-miR-363-5p	FLOT1	-	-	-	+
hsa-miR-363-5p	FLOT2	+	-	-	-
hsa-miR-363-5p	FLT4	-	-	-	+
hsa-miR-363-5p	FLVCR2	-	-	-	+
hsa-miR-363-5p	FMNL3	-	-	-	+
hsa-miR-363-5p	FNBP1	-	-	-	+
hsa-miR-363-5p	FNBP4	-	-	-	+
hsa-miR-363-5p	FNIP1	+	-	-	+
hsa-miR-363-5p	FOSL1	+	-	-	+
hsa-miR-363-5p	FOXE1	+	-	-	+
hsa-miR-363-5p	FOXI1	-	-	-	+
hsa-miR-363-5p	FOXI2	+	-	-	+
hsa-miR-363-5p	FOXJ1	-	+	-	+
hsa-miR-363-5p	FOXJ2	+	+	-	+
hsa-miR-363-5p	FOXL1	+	-	-	-
hsa-miR-363-5p	FOXN1	-	-	-	+
hsa-miR-363-5p	FOXO3	-	-	-	+
hsa-miR-363-5p	FOXO4	-	-	-	+
hsa-miR-363-5p	FOXO6	-	-	-	+
hsa-miR-363-5p	FOXP4	-	+	-	+
hsa-miR-363-5p	FRAT2	-	+	-	+
hsa-miR-363-5p	FSCN3	-	-	-	+
hsa-miR-363-5p	FSTL3	-	-	-	+
hsa-miR-363-5p	FTO	+	-	-	-
hsa-miR-363-5p	FUCA1	+	-	-	+
hsa-miR-363-5p	FUK	+	-	-	-
hsa-miR-363-5p	FURIN	-	-	-	+
hsa-miR-363-5p	FUT2	+	-	-	-
hsa-miR-363-5p	FUT5	+	-	-	+
hsa-miR-363-5p	FUT9	+	-	-	-
hsa-miR-363-5p	FXR2	-	+	-	+
hsa-miR-363-5p	FXYD2	+	-	-	-
hsa-miR-363-5p	FXYD6-FXYD2	+	-	-	-
hsa-miR-363-5p	FXYD7	+	-	-	-
hsa-miR-363-5p	FZD3	-	-	-	+
hsa-miR-363-5p	FZD5	-	-	-	+
hsa-miR-363-5p	FZD6	+	-	+	-
hsa-miR-363-5p	G3BP2	-	-	-	+
hsa-miR-363-5p	G6PC	+	-	-	-
hsa-miR-363-5p	G6PD	-	-	-	+
hsa-miR-363-5p	GAB2	+	-	-	+
hsa-miR-363-5p	GABRA4	-	-	-	+
hsa-miR-363-5p	GABRR1	+	-	-	-
hsa-miR-363-5p	GALNT10	-	-	-	+
hsa-miR-363-5p	GALNT4	-	-	-	+
hsa-miR-363-5p	GAP43	+	-	-	-
hsa-miR-363-5p	GARNL1	-	+	-	-
hsa-miR-363-5p	GAS7	-	+	-	+
hsa-miR-363-5p	GATA4	-	-	-	+
hsa-miR-363-5p	GATA5	-	-	-	+
hsa-miR-363-5p	GATAD2B	-	-	-	+
hsa-miR-363-5p	GBP6	-	-	-	+
hsa-miR-363-5p	GCM1	-	-	-	+
hsa-miR-363-5p	GCN1L1	-	-	-	+
hsa-miR-363-5p	GCNT4	+	-	-	-
hsa-miR-363-5p	GDA	+	+	-	+
hsa-miR-363-5p	GDAP1L1	-	-	-	+
hsa-miR-363-5p	GDF11	-	-	-	+
hsa-miR-363-5p	GDF2	+	-	-	-
hsa-miR-363-5p	GDF6	-	-	-	+
hsa-miR-363-5p	GDF7	+	-	-	-
hsa-miR-363-5p	GDI1	-	-	-	+
hsa-miR-363-5p	GDNF	+	-	-	-
hsa-miR-363-5p	GDPD2	+	-	-	-
hsa-miR-363-5p	GEN1	-	-	-	+
hsa-miR-363-5p	GFAP	-	-	-	+
hsa-miR-363-5p	GFM2	-	-	-	+
hsa-miR-363-5p	GFRA3	+	-	-	+
hsa-miR-363-5p	GFRA4	-	-	-	+
hsa-miR-363-5p	GFRAL	-	-	-	+
hsa-miR-363-5p	GHR	-	-	-	+
hsa-miR-363-5p	GID4	-	-	-	+
hsa-miR-363-5p	GIGYF1	-	-	+	-
hsa-miR-363-5p	GIMAP1	-	-	-	+
hsa-miR-363-5p	GIPC3	-	-	-	+
hsa-miR-363-5p	GIT1	-	-	-	+
hsa-miR-363-5p	GIT2	+	-	-	+
hsa-miR-363-5p	GJB4	-	-	-	+
hsa-miR-363-5p	GJC1	-	-	-	+
hsa-miR-363-5p	GJD3	+	-	-	-
hsa-miR-363-5p	GLCCI1	-	-	-	+
hsa-miR-363-5p	GLI3	-	-	-	+
hsa-miR-363-5p	GLIS2	-	-	-	+
hsa-miR-363-5p	GLOD5	+	-	-	-
hsa-miR-363-5p	GLP2R	+	-	-	+
hsa-miR-363-5p	GLRX	-	-	+	+
hsa-miR-363-5p	GLT1D1	+	-	-	-
hsa-miR-363-5p	GLTSCR1	-	-	-	+
hsa-miR-363-5p	GMEB2	-	-	-	+
hsa-miR-363-5p	GMNC	+	+	-	+
hsa-miR-363-5p	GNA12	-	-	-	+
hsa-miR-363-5p	GNAO1	-	-	-	+
hsa-miR-363-5p	GNE	-	-	+	-
hsa-miR-363-5p	GNG12	-	-	-	+
hsa-miR-363-5p	GNG2	-	+	-	+
hsa-miR-363-5p	GNG3	+	-	-	-
hsa-miR-363-5p	GNG4	-	+	+	+
hsa-miR-363-5p	GNG7	-	+	-	+
hsa-miR-363-5p	GP6	-	+	-	+
hsa-miR-363-5p	GPC1	-	-	-	+
hsa-miR-363-5p	GPCPD1	-	-	-	+
hsa-miR-363-5p	GPD1	+	-	-	+
hsa-miR-363-5p	GPD1L	-	-	-	+
hsa-miR-363-5p	GPR123	+	-	-	+
hsa-miR-363-5p	GPR135	+	-	-	-
hsa-miR-363-5p	GPR137	-	-	-	+
hsa-miR-363-5p	GPR153	-	-	-	+
hsa-miR-363-5p	GPR157	+	-	-	-
hsa-miR-363-5p	GPR35	+	-	-	-
hsa-miR-363-5p	GPR42	+	-	-	-
hsa-miR-363-5p	GPR55	-	-	-	+
hsa-miR-363-5p	GPR65	-	+	-	-
hsa-miR-363-5p	GPR75	+	-	-	-
hsa-miR-363-5p	GPR97	+	-	-	-
hsa-miR-363-5p	GPRIN1	-	-	-	+
hsa-miR-363-5p	GPSM1	-	-	-	+
hsa-miR-363-5p	GPX3	-	-	-	+
hsa-miR-363-5p	GPX6	+	-	-	-
hsa-miR-363-5p	GPX7	+	-	-	-
hsa-miR-363-5p	GRAMD1B	-	-	-	+
hsa-miR-363-5p	GRAMD2	-	-	-	+
hsa-miR-363-5p	GRAMD4	-	-	-	+
hsa-miR-363-5p	GRB2	+	+	-	-
hsa-miR-363-5p	GRB7	+	-	-	-
hsa-miR-363-5p	GREB1	-	-	-	+
hsa-miR-363-5p	GRID1	-	-	-	+
hsa-miR-363-5p	GRIK1-AS2	+	-	-	-
hsa-miR-363-5p	GRIK4	-	-	-	+
hsa-miR-363-5p	GRIN2A	-	+	-	+
hsa-miR-363-5p	GRIN2D	-	-	+	+
hsa-miR-363-5p	GRIN3A	+	-	-	+
hsa-miR-363-5p	GRK1	+	-	-	-
hsa-miR-363-5p	GRM1	-	-	-	+
hsa-miR-363-5p	GRM7	-	-	-	+
hsa-miR-363-5p	GSE1	+	-	-	-
hsa-miR-363-5p	GSG1	-	-	-	+
hsa-miR-363-5p	GSG1L	+	+	-	-
hsa-miR-363-5p	GTF2E1	-	-	-	+
hsa-miR-363-5p	GTF3C1	-	-	-	+
hsa-miR-363-5p	GTF3C5	+	-	-	-
hsa-miR-363-5p	GTPBP1	-	-	-	+
hsa-miR-363-5p	GTSE1	+	-	-	-
hsa-miR-363-5p	GUCA2A	+	-	-	-
hsa-miR-363-5p	GUCD1	+	-	-	+
hsa-miR-363-5p	GYG2P1	-	-	-	+
hsa-miR-363-5p	GYS1	+	-	-	+
hsa-miR-363-5p	GZMB	+	-	-	-
hsa-miR-363-5p	H2AFB1	+	-	-	-
hsa-miR-363-5p	H2AFB2	+	-	-	-
hsa-miR-363-5p	H2AFB3	+	-	-	-
hsa-miR-363-5p	H6PD	+	-	-	+
hsa-miR-363-5p	HABP2	-	-	-	+
hsa-miR-363-5p	HAND1	-	+	-	+
hsa-miR-363-5p	HAPLN1	-	-	-	+
hsa-miR-363-5p	HAPLN4	-	-	-	+
hsa-miR-363-5p	HBS1L	-	-	-	+
hsa-miR-363-5p	HCFC1	-	-	-	+
hsa-miR-363-5p	HCN2	-	-	-	+
hsa-miR-363-5p	HCN3	-	-	-	+
hsa-miR-363-5p	HCN4	-	-	-	+
hsa-miR-363-5p	HCRT	+	-	-	-
hsa-miR-363-5p	HDAC11	-	-	-	+
hsa-miR-363-5p	HDAC5	-	-	-	+
hsa-miR-363-5p	HDAC9	-	+	-	-
hsa-miR-363-5p	HDLBP	-	-	-	+
hsa-miR-363-5p	HELZ	-	-	-	+
hsa-miR-363-5p	HELZ2	-	-	-	+
hsa-miR-363-5p	HEPACAM	+	-	-	+
hsa-miR-363-5p	HERC1	+	-	-	+
hsa-miR-363-5p	HGSNAT	-	-	-	+
hsa-miR-363-5p	HHIPL1	-	-	-	+
hsa-miR-363-5p	HHLA1	-	-	-	+
hsa-miR-363-5p	HHLA2	+	-	-	-
hsa-miR-363-5p	HIC2	-	+	+	+
hsa-miR-363-5p	HID1	+	-	-	-
hsa-miR-363-5p	HIPK2	-	-	-	+
hsa-miR-363-5p	HIST1H1B	+	-	-	+
hsa-miR-363-5p	HIST1H1D	+	-	-	+
hsa-miR-363-5p	HIST1H1E	+	-	+	+
hsa-miR-363-5p	HIST1H1T	+	-	-	+
hsa-miR-363-5p	HIST1H2AD	-	-	+	-
hsa-miR-363-5p	HIST1H2AE	+	-	+	-
hsa-miR-363-5p	HIST1H2AG	+	-	+	-
hsa-miR-363-5p	HIST1H2AM	+	-	-	+
hsa-miR-363-5p	HIST1H2BF	+	-	+	-
hsa-miR-363-5p	HIST1H2BH	+	-	-	-
hsa-miR-363-5p	HIST1H3B	+	-	+	-
hsa-miR-363-5p	HIST1H3H	-	-	+	-
hsa-miR-363-5p	HIST2H2AA3	+	-	+	-
hsa-miR-363-5p	HIST2H2AA4	+	-	+	+
hsa-miR-363-5p	HIST2H2AC	-	-	+	+
hsa-miR-363-5p	HIST2H2BE	+	-	+	+
hsa-miR-363-5p	HIST2H3A	+	-	+	-
hsa-miR-363-5p	HIST2H3C	+	-	+	-
hsa-miR-363-5p	HIST3H2A	+	-	-	-
hsa-miR-363-5p	HIST3H2BB	+	-	+	-
hsa-miR-363-5p	HIST3H3	+	-	+	+
hsa-miR-363-5p	HIVEP3	+	-	-	+
hsa-miR-363-5p	HLA-DOA	-	-	-	+
hsa-miR-363-5p	HLA-DOB	+	-	-	-
hsa-miR-363-5p	HLCS	-	-	-	+
hsa-miR-363-5p	HMG20B	-	-	-	+
hsa-miR-363-5p	HMGA1	-	-	-	+
hsa-miR-363-5p	HMX1	-	-	+	-
hsa-miR-363-5p	HNF4G	+	-	-	-
hsa-miR-363-5p	HOOK2	+	-	-	+
hsa-miR-363-5p	HOXA3	+	-	-	+
hsa-miR-363-5p	HOXA4	+	-	-	-
hsa-miR-363-5p	HOXB1	+	-	-	-
hsa-miR-363-5p	HOXB13	-	-	-	+
hsa-miR-363-5p	HOXB3	+	-	-	-
hsa-miR-363-5p	HOXB6	+	-	-	-
hsa-miR-363-5p	HOXB8	+	-	-	+
hsa-miR-363-5p	HOXC4	-	-	-	+
hsa-miR-363-5p	HOXC8	-	-	-	+
hsa-miR-363-5p	HPCA	-	-	-	+
hsa-miR-363-5p	HPCAL4	-	-	-	+
hsa-miR-363-5p	HPDL	+	-	-	-
hsa-miR-363-5p	HPN	+	-	-	-
hsa-miR-363-5p	HPS1	-	-	-	+
hsa-miR-363-5p	HR	-	-	-	+
hsa-miR-363-5p	HRH2	-	+	-	+
hsa-miR-363-5p	HRH3	-	-	-	+
hsa-miR-363-5p	HRK	+	-	-	-
hsa-miR-363-5p	HS3ST2	+	-	-	-
hsa-miR-363-5p	HS6ST1	+	+	-	+
hsa-miR-363-5p	hsa-mir-4763	-	-	-	+
hsa-miR-363-5p	HSBP1L1	+	-	-	-
hsa-miR-363-5p	HSD3B1	+	-	-	-
hsa-miR-363-5p	HSD3B2	+	-	-	+
hsa-miR-363-5p	HSD3B7	+	-	-	-
hsa-miR-363-5p	HSF1	-	-	-	+
hsa-miR-363-5p	HSPA12A	-	-	-	+
hsa-miR-363-5p	HSPA12B	-	-	-	+
hsa-miR-363-5p	HSPG2	+	-	-	-
hsa-miR-363-5p	HTR1D	-	-	-	+
hsa-miR-363-5p	HTR5A	+	-	-	-
hsa-miR-363-5p	HTT	-	-	-	+
hsa-miR-363-5p	HYI	+	-	-	-
hsa-miR-363-5p	IBA57	-	-	-	+
hsa-miR-363-5p	ICAM1	-	-	-	+
hsa-miR-363-5p	IDH3B	+	-	-	-
hsa-miR-363-5p	IER5L	-	-	-	+
hsa-miR-363-5p	IFFO2	+	-	-	+
hsa-miR-363-5p	IFI30	-	+	-	+
hsa-miR-363-5p	IFLTD1	-	-	-	+
hsa-miR-363-5p	IFNL2	+	-	-	-
hsa-miR-363-5p	IFNLR1	+	-	-	-
hsa-miR-363-5p	IFRG15	+	-	-	-
hsa-miR-363-5p	IGDCC3	-	-	-	+
hsa-miR-363-5p	IGF1R	-	-	+	+
hsa-miR-363-5p	IGF2	+	-	-	+
hsa-miR-363-5p	IGF2-AS	-	-	-	+
hsa-miR-363-5p	IGF2BP1	+	-	-	+
hsa-miR-363-5p	IGFBP5	-	+	-	+
hsa-miR-363-5p	IGFL1	-	-	-	+
hsa-miR-363-5p	IGLL1	+	-	-	-
hsa-miR-363-5p	IGLL5	+	-	-	-
hsa-miR-363-5p	IGLON5	-	-	-	+
hsa-miR-363-5p	IGSF3	-	-	-	+
hsa-miR-363-5p	IHH	-	-	-	+
hsa-miR-363-5p	IL12RB1	+	+	-	+
hsa-miR-363-5p	IL13RA1	-	-	-	+
hsa-miR-363-5p	IL16	-	-	-	+
hsa-miR-363-5p	IL17RA	-	-	-	+
hsa-miR-363-5p	IL17RD	+	+	-	+
hsa-miR-363-5p	IL17REL	-	-	-	+
hsa-miR-363-5p	IL24	+	-	-	-
hsa-miR-363-5p	IL2RA	+	-	-	+
hsa-miR-363-5p	IL2RB	-	-	-	+
hsa-miR-363-5p	IL6ST	-	-	-	+
hsa-miR-363-5p	ILF3	-	-	-	+
hsa-miR-363-5p	INA	-	-	-	+
hsa-miR-363-5p	INCENP	-	-	-	+
hsa-miR-363-5p	ING5	-	-	-	+
hsa-miR-363-5p	INHBB	+	-	-	-
hsa-miR-363-5p	INHBE	-	-	-	+
hsa-miR-363-5p	INMT	-	-	+	-
hsa-miR-363-5p	INPP5K	-	-	-	+
hsa-miR-363-5p	INSRR	-	-	-	+
hsa-miR-363-5p	IPMK	+	-	-	+
hsa-miR-363-5p	IPO13	+	-	-	-
hsa-miR-363-5p	IQCE	-	-	-	+
hsa-miR-363-5p	IQSEC2	-	+	-	+
hsa-miR-363-5p	IQSEC3	-	+	-	+
hsa-miR-363-5p	IREB2	-	-	-	+
hsa-miR-363-5p	IRF2BP1	-	+	-	+
hsa-miR-363-5p	IRGQ	-	-	-	+
hsa-miR-363-5p	ISCA1	+	+	-	+
hsa-miR-363-5p	ISLR2	+	-	-	+
hsa-miR-363-5p	ISY1-RAB43	-	-	-	+
hsa-miR-363-5p	ITFG2	-	+	-	-
hsa-miR-363-5p	ITFG3	+	-	-	+
hsa-miR-363-5p	ITGA10	+	-	-	+
hsa-miR-363-5p	ITGA2	-	-	+	-
hsa-miR-363-5p	ITGA5	-	-	-	+
hsa-miR-363-5p	ITGAL	-	-	-	+
hsa-miR-363-5p	ITGB5	-	-	-	+
hsa-miR-363-5p	ITGB7	+	-	-	-
hsa-miR-363-5p	ITGBL1	+	+	-	+
hsa-miR-363-5p	ITIH4	-	-	-	+
hsa-miR-363-5p	ITPK1	-	-	-	+
hsa-miR-363-5p	ITPKB	+	+	-	+
hsa-miR-363-5p	IYD	-	-	-	+
hsa-miR-363-5p	JADE2	-	+	-	+
hsa-miR-363-5p	JAK2	-	-	-	+
hsa-miR-363-5p	JAK3	-	-	-	+
hsa-miR-363-5p	JAKMIP3	-	-	-	+
hsa-miR-363-5p	JAM2	-	-	-	+
hsa-miR-363-5p	JDP2	+	-	-	-
hsa-miR-363-5p	JMJD6	-	-	-	+
hsa-miR-363-5p	JMJD8	+	-	-	+
hsa-miR-363-5p	KAAG1	+	-	-	-
hsa-miR-363-5p	KALRN	-	+	-	-
hsa-miR-363-5p	KANK2	-	-	-	+
hsa-miR-363-5p	KANK3	+	-	-	+
hsa-miR-363-5p	KATNB1	-	-	-	+
hsa-miR-363-5p	KAZN	-	-	-	+
hsa-miR-363-5p	KBTBD11	+	-	-	+
hsa-miR-363-5p	KBTBD12	+	-	-	+
hsa-miR-363-5p	KBTBD6	-	-	-	+
hsa-miR-363-5p	KCNA6	+	-	-	+
hsa-miR-363-5p	KCNAB2	+	-	-	+
hsa-miR-363-5p	KCNC1	-	-	-	+
hsa-miR-363-5p	KCNC3	-	-	-	+
hsa-miR-363-5p	KCNE1	+	-	-	+
hsa-miR-363-5p	KCNE3	-	-	-	+
hsa-miR-363-5p	KCNE5	-	-	-	+
hsa-miR-363-5p	KCNF1	-	-	-	+
hsa-miR-363-5p	KCNH4	+	-	-	-
hsa-miR-363-5p	KCNIP2	-	-	-	+
hsa-miR-363-5p	KCNIP3	-	-	-	+
hsa-miR-363-5p	KCNIP4	-	-	-	+
hsa-miR-363-5p	KCNJ10	+	-	-	-
hsa-miR-363-5p	KCNJ12	+	-	-	+
hsa-miR-363-5p	KCNJ6	+	-	-	-
hsa-miR-363-5p	KCNK1	+	-	-	-
hsa-miR-363-5p	KCNK17	+	+	-	+
hsa-miR-363-5p	KCNQ4	+	-	-	+
hsa-miR-363-5p	KCTD12	-	-	-	+
hsa-miR-363-5p	KCTD9	+	+	-	+
hsa-miR-363-5p	KDELR3	+	-	-	-
hsa-miR-363-5p	KDM4B	-	-	-	+
hsa-miR-363-5p	KDM4D	-	-	-	+
hsa-miR-363-5p	KDM5C	-	-	-	+
hsa-miR-363-5p	KDM6B	-	+	-	+
hsa-miR-363-5p	KEAP1	-	-	-	+
hsa-miR-363-5p	KIAA0141	+	-	-	+
hsa-miR-363-5p	KIAA0195	-	-	-	+
hsa-miR-363-5p	KIAA0247	-	-	-	+
hsa-miR-363-5p	KIAA0319	-	-	-	+
hsa-miR-363-5p	KIAA0513	-	-	-	+
hsa-miR-363-5p	KIAA0556	-	-	-	+
hsa-miR-363-5p	KIAA0930	+	-	-	-
hsa-miR-363-5p	KIAA1024	-	-	-	+
hsa-miR-363-5p	KIAA1109	-	-	-	+
hsa-miR-363-5p	KIAA1161	-	-	-	+
hsa-miR-363-5p	KIAA1199	-	-	-	+
hsa-miR-363-5p	KIAA1217	-	-	-	+
hsa-miR-363-5p	KIAA1244	-	-	-	+
hsa-miR-363-5p	KIAA1279	+	-	-	-
hsa-miR-363-5p	KIAA1407	+	-	-	-
hsa-miR-363-5p	KIAA1467	-	-	-	+
hsa-miR-363-5p	KIAA1522	-	-	-	+
hsa-miR-363-5p	KIAA1549	-	-	-	+
hsa-miR-363-5p	KIAA1644	+	+	-	+
hsa-miR-363-5p	KIAA1755	-	-	-	+
hsa-miR-363-5p	KIF13B	-	-	-	+
hsa-miR-363-5p	KIF18B	-	-	-	+
hsa-miR-363-5p	KIF1A	-	-	-	+
hsa-miR-363-5p	KIF1C	-	-	-	+
hsa-miR-363-5p	KIF21B	-	-	-	+
hsa-miR-363-5p	KIF3A	-	-	-	+
hsa-miR-363-5p	KIF3B	-	-	-	+
hsa-miR-363-5p	KIRREL2	+	-	-	-
hsa-miR-363-5p	KIRREL3	-	-	-	+
hsa-miR-363-5p	KLF1	+	-	-	+
hsa-miR-363-5p	KLF13	+	-	-	+
hsa-miR-363-5p	KLF16	-	-	-	+
hsa-miR-363-5p	KLHDC8A	-	-	-	+
hsa-miR-363-5p	KLHL14	-	-	-	+
hsa-miR-363-5p	KLHL18	-	-	-	+
hsa-miR-363-5p	KLHL31	-	-	-	+
hsa-miR-363-5p	KLK10	+	-	-	+
hsa-miR-363-5p	KLK7	-	-	-	+
hsa-miR-363-5p	KLRK1	+	-	-	-
hsa-miR-363-5p	KMO	+	-	-	+
hsa-miR-363-5p	KMT2D	-	+	-	+
hsa-miR-363-5p	KPNA2	-	+	-	-
hsa-miR-363-5p	KPNA4	-	-	-	+
hsa-miR-363-5p	KPTN	+	+	-	-
hsa-miR-363-5p	KRT1	+	-	-	-
hsa-miR-363-5p	KRT7	+	-	-	-
hsa-miR-363-5p	KRT71	-	-	-	+
hsa-miR-363-5p	KRT81	-	-	-	+
hsa-miR-363-5p	KRT82	+	-	-	-
hsa-miR-363-5p	KRT85	+	-	-	-
hsa-miR-363-5p	KRT86	+	-	-	-
hsa-miR-363-5p	KRTAP1-5	-	-	-	+
hsa-miR-363-5p	KRTAP4-7	+	-	-	-
hsa-miR-363-5p	KRTAP5-6	+	-	-	-
hsa-miR-363-5p	KSR1	-	-	-	+
hsa-miR-363-5p	KSR2	-	-	-	+
hsa-miR-363-5p	L1CAM	-	-	-	+
hsa-miR-363-5p	LAD1	-	-	-	+
hsa-miR-363-5p	LAIR1	+	-	-	+
hsa-miR-363-5p	LAMA5	+	+	-	-
hsa-miR-363-5p	LAMC2	+	+	-	+
hsa-miR-363-5p	LARP1	-	-	-	+
hsa-miR-363-5p	LASP1	-	-	-	+
hsa-miR-363-5p	LATS1	-	-	-	+
hsa-miR-363-5p	LBP	-	-	-	+
hsa-miR-363-5p	LCK	+	-	-	-
hsa-miR-363-5p	LCN1	-	-	-	+
hsa-miR-363-5p	LCN10	+	-	-	-
hsa-miR-363-5p	LCN15	+	-	-	-
hsa-miR-363-5p	LCN6	+	-	-	-
hsa-miR-363-5p	LDB1	-	-	-	+
hsa-miR-363-5p	LDOC1	+	-	-	-
hsa-miR-363-5p	LDOC1L	+	-	-	+
hsa-miR-363-5p	LEPROT	-	-	-	+
hsa-miR-363-5p	LETM1	-	-	-	+
hsa-miR-363-5p	LETMD1	+	-	-	-
hsa-miR-363-5p	LGI2	-	-	-	+
hsa-miR-363-5p	LHPP	-	-	-	+
hsa-miR-363-5p	LHX6	-	+	-	+
hsa-miR-363-5p	LIF	-	-	-	+
hsa-miR-363-5p	LIFR	-	-	-	+
hsa-miR-363-5p	LILRA1	-	-	-	+
hsa-miR-363-5p	LIMD2	-	-	-	+
hsa-miR-363-5p	LIMK1	-	-	-	+
hsa-miR-363-5p	LIMK2	+	-	-	+
hsa-miR-363-5p	LINC00923	+	-	-	-
hsa-miR-363-5p	LIX1L	+	-	-	-
hsa-miR-363-5p	LL22NC03-63E9.3	+	-	-	+
hsa-miR-363-5p	LLGL1	+	-	+	-
hsa-miR-363-5p	LMNA	-	-	-	+
hsa-miR-363-5p	LMOD1	-	+	-	+
hsa-miR-363-5p	LMX1B	-	-	-	+
hsa-miR-363-5p	LNP1	+	-	-	-
hsa-miR-363-5p	LOC100132874	-	+	-	-
hsa-miR-363-5p	LOC100996643	-	+	-	-
hsa-miR-363-5p	LOC101927402	-	+	-	-
hsa-miR-363-5p	LOC101928195	-	+	-	-
hsa-miR-363-5p	LPAR5	-	-	-	+
hsa-miR-363-5p	LPCAT2	-	-	-	+
hsa-miR-363-5p	LPPR2	-	-	-	+
hsa-miR-363-5p	LRP2BP	+	-	-	-
hsa-miR-363-5p	LRRC10B	-	-	-	+
hsa-miR-363-5p	LRRC14	-	-	-	+
hsa-miR-363-5p	LRRC15	+	-	-	-
hsa-miR-363-5p	LRRC16B	-	-	-	+
hsa-miR-363-5p	LRRC20	-	-	-	+
hsa-miR-363-5p	LRRC25	+	-	-	-
hsa-miR-363-5p	LRRC32	-	+	-	+
hsa-miR-363-5p	LRRC34	-	+	-	-
hsa-miR-363-5p	LRRC3B	-	-	-	+
hsa-miR-363-5p	LRRC47	-	-	+	-
hsa-miR-363-5p	LRRD1	+	-	-	-
hsa-miR-363-5p	LRTOMT	-	-	+	-
hsa-miR-363-5p	LST1	+	-	-	-
hsa-miR-363-5p	LTB4R2	-	-	-	+
hsa-miR-363-5p	LTBP2	-	-	-	+
hsa-miR-363-5p	LY9	+	-	-	+
hsa-miR-363-5p	LYPD6	+	-	-	+
hsa-miR-363-5p	LZTR1	+	-	-	-
hsa-miR-363-5p	MAB21L2	-	-	-	+
hsa-miR-363-5p	MAF	-	-	-	+
hsa-miR-363-5p	MAFG	-	+	-	+
hsa-miR-363-5p	MAGI3	-	-	+	+
hsa-miR-363-5p	MAMLD1	+	-	-	-
hsa-miR-363-5p	MAN2A1	+	-	-	-
hsa-miR-363-5p	MANSC1	-	-	+	-
hsa-miR-363-5p	MAP1B	-	+	-	+
hsa-miR-363-5p	MAP1LC3C	-	-	-	+
hsa-miR-363-5p	MAP2K2	+	-	-	+
hsa-miR-363-5p	MAP2K5	-	-	-	+
hsa-miR-363-5p	MAP2K7	-	-	-	+
hsa-miR-363-5p	MAP3K13	-	-	-	+
hsa-miR-363-5p	MAP3K2	-	+	-	+
hsa-miR-363-5p	MAP3K3	+	+	-	+
[truncated: 63,536 more rows]
